1           **Secreted filarial nematode galectins modulate host immune cells**

2           **Hannah J. Loghry<sup>1</sup>, Noelle A Sondjaja<sup>1</sup>, Sarah J Minkler<sup>1</sup>, Michael J Kimber<sup>1</sup>**

3

4           <sup>1</sup>Department of Biomedical Sciences, College of Veterinary Medicine, Iowa State University,  
5           Ames, Iowa, USA

6

7

8

9           Word Count: 7,989

10          Figure Count: 6

11

12          Keywords: *Brugia malayi*, galectin, filarial, immunomodulation, extracellular vesicles

## 13 **Abstract**

14 Lymphatic filariasis (LF) is a mosquito-borne disease caused by filarial nematodes including  
15 *Brugia malayi*. Over 860 million people worldwide are infected or at risk of infection in 72  
16 endemic countries. The absence of a protective vaccine means that current control strategies rely  
17 on mass drug administration programs that utilize inadequate drugs that cannot effectively kill  
18 adult parasites, thus established infections are incurable. Progress to address deficiencies in the  
19 approach to LF control is hindered by a poor mechanistic understanding of host-parasite  
20 interactions, including mechanisms of host immunomodulation by the parasite, a critical  
21 adaptation for establishing and maintaining infections. The canonical type 2 host response to  
22 helminth infection characterized by anti-inflammatory and regulatory immune phenotypes is  
23 modified by filarial nematodes during chronic LF. Current efforts at identifying parasite-derived  
24 factors driving this modification focus on parasite excretory-secretory products (ESP), including  
25 extracellular vesicles (EVs). We have previously profiled the cargo of *B. malayi* EVs and  
26 identified *B. malayi* galectin-1 and galectin-2 as among the most abundant EV proteins. In this  
27 study we further investigated the function of these proteins. Sequence analysis of the parasite  
28 galectins revealed highest homology to mammalian galectin-9 and functional characterization  
29 identified similar substrate affinities consistent with this designation. Immunological assays  
30 showed that Bma-LEC-2 is a bioactive protein that can polarize macrophages to an alternatively  
31 activated phenotype and selectively induce apoptosis in Th1 cells. Our data shows that an  
32 abundantly secreted parasite galectin is immunomodulatory and induces phenotypes consistent  
33 with the modified type 2 response characteristic of chronic LF infection.

## 34 **1. Introduction**

35 Lymphatic filariasis (LF) is a mosquito-borne neglected tropical disease (NTD) caused by  
36 parasitic, filarial nematodes including *Brugia malayi*, *Brugia timori*, and *Wuchereria bancrofti*.  
37 LF is endemic in 72 countries and over 860 million people are infected or at risk of infection (1).  
38 Infection is often asymptomatic, but can also result in clinical symptoms with extreme morbidity  
39 leading to mortality in some cases. Morbidities of this disease include lymphangitis,  
40 lymphedema, primarily in the extremities, and secondary bacterial infection/dermatitis (2). Mass  
41 drug administration programs are the most common disease control strategies employed in  
42 endemic countries. With the absence of a protective vaccine, these programs rely on inadequate  
43 drugs that cannot effectively kill adult parasites leaving established infections incurable. While  
44 solutions to both these deficiencies are being investigated, progress is hindered by a poor  
45 mechanistic understanding of parasite biology and host-parasite interactions including  
46 mechanisms of host immunomodulation by the parasite.

47 Host immunomodulation is critical for establishing and maintaining infections. In chronic LF,  
48 this modulation is seen in the development of a “modified” type 2 immune response that is  
49 characterized by an increase in alternatively activated macrophage (3–5) and regulatory T cell  
50 populations (5–10), an increase in the IL-4 and IL-10 regulatory environment (11–13), and a  
51 suppression, or hyporesponsiveness, of effector T cells (14–17). The outcome of this  
52 modification is to create a state of immune tolerance where the host can maintain an active  
53 immune response, but damage to the parasite is limited. This modified type 2 response exists, at  
54 least in part, as an immune evasion strategy with parasite excretory-secretory products (ESP) as a  
55 well-established source of effector molecules driving the modifications. Parasite ESP encompass  
56 freely secreted proteins and nucleic acids, as well as extracellular vesicles (EVs), a heterogenous

57 group of cell-derived, membrane-bound vesicles that are known to be involved in various  
58 physiological processes and inter-cell communication (18,19). It has been identified that filarial  
59 nematodes secrete EVs and that they contain cargo such as proteins, lipids and small RNA  
60 species some with immunomodulatory functions (20–25). In addition, there is evidence that  
61 parasitic nematode EVs are involved in the immunomodulation of the mammalian host  
62 (20,21,25–32). EVs represent a compelling mechanism for the non-canonical secretion of  
63 immunomodulatory molecules and their subsequent protected trafficking and delivery to host  
64 cells but we have a poor understanding of how cargo molecules contained within EVs might  
65 exert their modulatory effects.

66 Our lab has previously identified two parasite derived proteins, Bma-LEC-1 and Bma-LEC-2, as  
67 amongst the most abundant proteins found within EVs secreted by adult female *B. malayi*.

68 Galectins are a protein family defined by their conserved  $\beta$ -galactoside binding sites within the  
69 approximate 130 aa carbohydrate recognition domain (CRD) (33). This family is divided into  
70 three sub-domains according to their CRD sequence and structure. The prototypical galectins  
71 contain one CRD domain, the chimeric galectin contain a single CRD domain connected to a  
72 non-lectin N-terminal region, and the tandem-repeat type galectins contain two CRD domains  
73 separated by a linker peptide (34). Synthesis of galectins occurs in the cytosol from where they  
74 can be directed to various cell compartments including vesicular trafficking pathways but not the  
75 ER-Golgi secretory pathway; as galectins do not contain a N-terminal signal sequence they must  
76 be secreted through alternative mechanisms such as EVs (35). The functional effects of galectins  
77 originate from their galactose-containing glycan binding properties and their ability to  
78 oligomerize. Tandem-repeat type galectins can oligomerize from associations of a N-terminal  
79 CRD with a N-terminal CRD of another galectin or a C-terminal CRD with a C-terminal CRD of

80 another galectin (36–38). The multivalency created by these galectin multimers, and by the  
81 presence of multiple glycans on a glycoprotein, can cause crosslinking of glycoproteins leading  
82 to glycoprotein segregation, formation of lattices, or endocytosis of bound glycoproteins (36,38–  
83 41). In addition, galectins have been shown to bind cytosolic and nuclear, non-carbohydrate  
84 ligands but the mechanisms of this are poorly understood (42,43). It must be noted that there are  
85 no true *a priori* functions of galectins, their functions depend on the effect that the specific  
86 glycoprotein or glycolipid counterreceptors has on a particular cell in a particular context (44).  
87 That said, mammalian galectins are known to have diverse and complex effects on the immune  
88 system, modulating both myeloid and lymphoid cells to elicit, in general, immunosuppressive  
89 responses (reviewed (44,45)).

90 We hypothesize that the parasite-derived proteins, Bma-LEC-1 and Bma-LEC-2, found within  
91 secreted EVs, are effector molecules that phenocopy host galectins to directly modulate the host  
92 immune response. To test this hypothesis, we produced recombinant Bma-LEC-1 and Bma-LEC-  
93 2 and investigated their glycan binding properties. We identified that Bma-LEC-1 and Bma-  
94 LEC-2 are most closely related to and have similar binding affinities as mammalian galectin-9. A  
95 human monocyte cell line and primary murine T cells were used as a model to further investigate  
96 the immunosuppressive functions of Bma-LEC-1 and Bma-LEC-2. It was found that although  
97 Bma-LEC-1 was not bioactive in the assays used here, treatment of human macrophages with  
98 Bma-LEC-2 lead to an increase in expression and production of IL-10, a potent anti-  
99 inflammatory cytokine, whilst Bma-LEC-2 also selectively induced apoptosis in Th1 cells, but  
100 not naïve CD4<sup>+</sup> T cells. These findings provide evidence that parasite derived galectins found  
101 within extracellular vesicles are capable of modulating the host immune response and promoting  
102 the modified type 2 immune phenotypes seen in chronic filarial infection.

103

## 104 **2. Materials and Methods**

### 105 **2.1 *Brugia malayi* Maintenance**

106 *B. malayi* were cultured and maintained as previously described (24), briefly, *B. malayi* parasites  
107 were obtained from the NIH/NIAID Filariasis Research Reagent Resource Center (FR3) at the  
108 University of Georgia, USA. Persistent *B. malayi* infections at FR3 are maintained in domestic  
109 short-haired cats. To obtain adult stage *B. malayi*, jirds were infected intraperitoneally with  
110 approximately 400 L3 stage parasites. 120 days post infection jirds were necropsied to collect  
111 adult stage parasites. L3 stage *B. malayi* were obtained from dissection of anesthetized *Aedes*  
112 *aegypti* 14 days post-infection. Microfilaria stage *B. malayi* were obtained from a lavage of the  
113 peritoneal cavity of a euthanized gerbil. Upon receipt at ISU, all *B. malayi* parasites were washed  
114 several times in worm culture media warmed to 37°C (RPMI with 1% HEPES, 1% L-glutamine,  
115 0.2% Penicillin/Streptomycin, and 1% w/v glucose (Thermo Fisher Scientific)), counted, and  
116 cultured at 37°C with 5% CO<sub>2</sub>.

### 117 **2.2 Expression and Purification of *B. malayi* Galectins**

118 Total RNA was isolated from adult female *B. malayi*. Briefly, approximately 30 parasites were  
119 homogenized in Trizol (Thermo Fisher Scientific) and mixed with chloroform (0.2 ml  
120 chloroform per ml Trizol) (Sigma-Aldrich, St. Louis, MO). Samples were shaken vigorously for  
121 20 s and allowed to sit at room temperature for 3 min followed by centrifugation at 10,000 x g  
122 for 18 min at 4°C. The aqueous phase was collected, and an equal volume of 100% ethanol was  
123 added. RNA was then purified and collected using a RNeasy Mini Kit (Qiagen, Hilden,  
124 Germany) according to manufacturer's instructions. cDNA synthesis was performed using the

125 Superscript III first strand cDNA synthesis kit (Thermo Fisher Scientific) per manufacturer's  
126 protocols. Gene sequences for *Bma-LEC-1* (WBGene00226528) and *Bma-LEC-2*  
127 (WBGene00224538) were obtained from wormbase parasite (46,47). Primers were designed for  
128 the predicted coding region of *Bma-LEC-1* and *Bma-LEC-2* that incorporated restriction digest  
129 sites facilitating recombination into the pOETIC 6xHis Transfer Plasmid (Mirus Bio, Madison,  
130 WI) (Supplemental Materials 1). The complete coding sequence for each galectin was PCR  
131 amplified from cDNA using Platinum Taq Polymerase High Fidelity (Thermo Fisher Scientific).  
132 The PCR product was visualized through TAE agarose gel electrophoresis and gel purified with  
133 Purelink Quick Gel Extraction kit (Thermo Fisher Scientific) per manufacturer's instructions.  
134 *Bma-LEC-1* and *-2* PCR products were digested and ligated into pOETIC 6xHis Transfer  
135 plasmid using T4 DNA ligase (Thermo Fisher Scientific), transformed into ampicillin resistant  
136 NEB alpha competent *E. coli* cells (New England Biolabs, Ipswich, MA), inoculated into LB +  
137 Ampicillin media (10g/L Tryptone, 5g/L Yeast Extract, 10g/L NaCl, 100 µg/mL Ampicillin)  
138 (Sigma-Aldrich) and incubated at 200 rpm at 37°C overnight. Plasmid was purified from  
139 transformed *E.coli* using Genelute Endotoxin-free plasmid midiprep kit (Sigma-Aldrich) per  
140 manufacturers' instructions and sequenced to confirm insert fidelity and orientation. The  
141 *Spodoptera frugiperda*-derived Sf21 cell line (Thermo Fisher Scientific, Waltham, MA) was  
142 maintained in Insect-XPRESS cell culture media (Lonza Bioscience, Basel, Switzerland)  
143 supplemented with 10% Chrysalis insect cell qualified FBS (Gemini Bio Products, West  
144 Sacramento, CA), 1% Penicillin (10,000 U/ml) 1% Streptomycin (10,000 ug/ml), and 0.25 µg/ml  
145 Amphotericin B (Thermo Fisher Scientific) in normoxic conditions at 28°C. Positive  
146 recombinant plasmid was transfected into Sf21 cells using the Flashbac Ultra Baculovirus  
147 Expression System (Mirus Bio). Viral Titers were determined with the BacPak qpcr Titration kit

148 (Takara Bio, Kusatsu, Shiga, Japan). Infected Sf21 cells were collected and lysed in dPBS  
149 (Thermo Fisher Scientific) containing Halt Protease Inhibitor Cocktail (Thermo Fisher  
150 Scientific) using a disruptor genie (Scientific Industries, Bohemia, NY). Protein expression was  
151 confirmed by western blot using a 6x His-Tag HRP conjugated Monoclonal Antibody (Thermo  
152 Fisher Scientific). Once verified, mass production of recombinant protein was achieved through  
153 large scale infections of 400 mL of Sf21s cells at a multiplicity of infection of 8. Cells were  
154 incubated for 3 days at 28°C at 130 rpm post infection.

155 To purify recombinant protein, cell pellets were lysed in dPBS containing protease inhibitors  
156 (Thermo Fisher Scientific) using glass beads and a cell disruptor genie (Scientific Industries).  
157 Cells were disrupted for 2 min then incubated on ice for 2 min, repeating for a total of 7 rounds  
158 of disruption. Disrupted cells were then centrifuged at 15,800 x g for 30 min at 4°C and the  
159 resulting supernatant collected with an initial protein purification performed using the HisPur Ni-  
160 NTA Resin (Thermo Fisher Scientific) following manufacturer's instructions for native protein  
161 confirmation and gravity flow columns. Eluted proteins were further purified on a HiPrep  
162 Sephacryl S-200 HR size exclusion column (Cytiva, Marlborough, MA) on a AKTA Pure  
163 FPLC (Cytiva). FPLC fractions were validated for purity using an SDS-PAGE gel stained with  
164 Coomassie Blue. Only clean fractions devoid of debris or non-specific proteins and containing  
165 the protein of interest were used for downstream experimentation. Double-purified protein was  
166 concentrated with Amicon Ultra Centrifugal Filters according to manufacturer's instructions  
167 (Sigma-Aldrich) and the concentration determined by a BCA assay using the Pierce BCA Protein  
168 assay kit (Thermo Fisher Scientific). Protein samples were aliquoted and stored at -80°C for  
169 future use.

### 170 **2.3 Assessment of glycan binding properties**



171 The functionality of the recombinant *B. malayi* galectins was first analyzed by hemagglutination  
172 assay as described by Sano and Ogawa (2014) (48). Briefly, two-fold serial dilutions of  
173 recombinant Bma-LEC-1 and Bma-LEC-2 were prepared in V-bottom 96-well plates (Greiner  
174 Bio-One, Kremsmünster, Austria) followed by the addition of a 4% solution of trypsinized,  
175 glutaraldehyde-fixed, rabbit erythrocytes (Innovative Research, Novi, MI) prepared as previously  
176 described (48). Briefly, 5 mL of isolated erythrocytes were suspended in 100 mL of a 0.1% (w/v)  
177 trypsin solution and incubated at 37°C for 1 h. After, erythrocytes were centrifuged at 500 x g for  
178 5 min and washed in 50 mL of dPBS (Thermo Fischer Scientific). Centrifuged erythrocytes were  
179 resuspended in 25 mL of a 1% glutaraldehyde solution in dPBS and incubated for 1 h at room  
180 temperature with a gentle shaking. Following, erythrocytes were washed twice with 25 mL of 0.1  
181 M glycine solution in dPBS. Erythrocytes were washed a final time in 25 mL of dPBS and stored  
182 as a 10% (v/v) erythrocyte suspension in dPBS at 4°C for future use. Plates were scored for  
183 hemagglutination activity after 30 min. As described previously (48), a solid colored well (mat)  
184 indicates that the galectin can agglutinate the erythrocytes by binding to the carbohydrate  
185 moieties on the surface of the cells and a dot in the center of the well indicates that the galectin is  
186 inactive or an inhibitor is present.

187 This same basic assay was also used to further investigate carbohydrate binding specificity of  
188 Bma-LEC-1 and Bma-LEC-2. An initial screening of the ability of recombinant Bma-LEC-1 and  
189 Bma-LEC-2, human galectin-9, and mouse galectin-9 to bind to 1 M galactose, 900 mM N-  
190 acetylgalactosamine (GalNAc), 1M lactose, 32.6mM N-acetyllactosamine (LacNAc), 2 M  
191 mannose, and 2 M glucose was tested. To determine the affinity of these proteins to the various  
192  $\beta$ -galactosides serial dilutions of galactose, N-acetylgalactosamine, lactose, N-acetyllactosamine,  
193 mannose, and glucose were prepared, followed by addition of the galectin of interest. The protein

194 carbohydrate mixture was allowed to incubate at room temperature for 30 min after which a 4%  
195 rabbit erythrocyte solution was added. The reaction was allowed to proceed for an additional 30  
196 min before scoring. In general, a solid colored well indicates that the galectin present is not  
197 binding to the carbohydrate of interest but is instead binding the erythrocytes forming a lattice of  
198 erythrocytes on the bottom of the well. A well with a dot in the center indicates that the galectin  
199 present is binding the carbohydrate of interest, not the erythrocytes, allowing them to sediment at  
200 the bottom of the well.

201 A more thorough assessment of parasite galectin activity was conducted by glycan binding array,  
202 performed by the Protein-Glycan Interaction Resource of the Consortium for Functional  
203 Glycomics (CFG) and the National Center for Functional Glycomics (NCFG) at Beth Israel  
204 Deaconess Medical Center, Harvard Medical School (supporting grants R24 GM137763).

205 Briefly, samples were assayed against a comprehensive array of 584 glycans provided by the  
206 NCFG. The array was generated from a library of natural and synthetic mammalian glycans with  
207 amino linkers printed onto N-hydroxysuccinimide (NHS)-activated glass microscope slides  
208 forming covalent amide linkages (49). The glycan spotting concentration was 100  $\mu$ M printed in  
209 6 technical replicates on each microarray. Alexa Fluor 488-labeled rBma-LEC-1 and rBma-LEC-  
210 2 were generated using the Alexa Fluor 488 Microscale Protein Labeling Kit per manufacturer's  
211 instructions (Thermo Fischer Scientific) with 5  $\mu$ g/ml and 50  $\mu$ g/ml concentrations incubated on  
212 the array for 1 h at room temperature. After washing off unbound sample with successive  
213 washes of PBS-tween, PBS, and water, slides were dried and scanned on a GenePix Microarray  
214 scanner (Molecular Devices, San Jose, CA, USA) at 488 nm. The Glycan Array Dashboard  
215 software (50) was used to compare binding specificities between galectins. GlycoGlyph (51), a  
216 glycan drawing program, was used to visualize glycan structures.

## 217 **2.4 RT-qPCR analysis of galectin gene expression**

218 30 adult female, 30 adult male, 1,500 L3 and  $2 \times 10^6$  microfilariae life stage *B. malayi* were  
219 manually homogenized in Trizol (Thermo Fischer Scientific) using a mortar and pestle and total  
220 RNA extracted as described above. cDNA was synthesized using a Superscript III First Strand  
221 cDNA Synthesis Kit (Thermo Fisher Scientific) according to manufacturer's instructions. RT-  
222 qPCR was conducted using SYBR green (Thermo Fisher Scientific) with gene-specific primers  
223 designed against *Bma-lec-1* and *Bma-lec-2* transcripts (Supplemental Materials 1). Average  $C_T$   
224 values for each life stage cDNA were recorded and relative abundance to the housekeeping gene  
225 *B. malayi* *NADH Dehydrogenase subunit 1* (ND1) (NC\_004298.1) using  $\Delta\Delta C_T$  method. Three  
226 independent RNA extractions were performed for biological replication.

## 227 **2.5 Western blot analysis of galectin expression**

228 To generate protein lysates from *B. malayi* tissues, 25 adult female, 45 adult male, 300 L3 and  
229  $4 \times 10^6$  microfilariae were homogenized with glass beads in RIPA buffer (Thermo Fischer  
230 Scientific) with Halt Protease Inhibitors (Thermo Fisher Scientific) using a disruptor genie  
231 (Scientific Industries) at 2500 rpm for 2 min followed by an incubation on ice for 2 min; a  
232 process repeated five times. Lysates were centrifuged at  $14,700 \times g$  for 30 min at  $4^\circ\text{C}$ . Protein  
233 samples were also generated from parasite extracellular vesicles (EVs). 165 adult females, 200  
234 adult males, 2,000 L3 and  $6.5 \times 10^6$  microfilariae were cultured for 48 h and EVs isolated from  
235 spent culture media as previously described (21,23,24). Briefly, media was filtered through 0.2  
236  $\mu\text{m}$  PVDF filtered syringes (GE Healthcare) and centrifuged at  $120,000 \times g$  for 90 min at  $4^\circ\text{C}$ .  
237 The supernatant was decanted but retained, leaving approximately 1.5 ml media to ensure that  
238 the EV pellet was not disrupted. The retained media and pellet were filtered through a PVDF 0.2  
239  $\mu\text{m}$  syringe filter and centrifuged at  $186,000 \times g$  for a further 2 h at  $4^\circ\text{C}$ . The remaining

240 supernatant was again decanted and added to previously collected supernatant leaving an isolated  
241 EV pellet. Protein was extracted from EVs by incubation in three times the volume of RIPA  
242 buffer and Halt Protease Inhibitors (Thermo Fisher Scientific) on ice for 30 min, with vortexing  
243 samples every 10 min. Following, samples were sonicated 30 s at 50% pulse then incubated on  
244 ice for 15 min; this process was repeated twice. Total protein was quantified from lysate, EVs or  
245 supernatant using the Pierce BCA Protein assay kit (Thermo Fisher Scientific) according to  
246 manufacturer's instructions. Three  $\mu\text{g}$  total protein from lysate, 8  $\mu\text{g}$  total protein from EVs and  
247 480 ng of total protein from supernatant were used in subsequent western blots.

248 A monoclonal antibody raised against Bma-LEC-2 was provided by the Budge Lab at  
249 Washington University (St. Louis, MO) (52). A western blot of serial dilutions of rBma-LEC-2  
250 was used to determine the sensitivity of this antibody to the recombinant protein. Proteins were  
251 resolved by SDS-PAGE using a 12% mini-PROTEAN TGX Gel (Biorad Laboratories, Hercules,  
252 CA) and transferred to a 0.2  $\mu\text{M}$  nitrocellulose membrane using a Trans-Blot Turbo Mini  
253 Transfer System (Biorad Laboratories). Membranes were blocked with a blocking buffer of 5%  
254 non-fat milk powder (Cell Signaling Technology, Danvers, MA) in phosphate buffered saline  
255 with 0.05% tween-20 (PBS-T) followed by an overnight incubation at 4°C with primary  
256 antibody diluted 1:2000 in blocking buffer. The membrane was washed five times, 5 min each,  
257 with PBS-T followed by a 2 h incubation on a shaker at room temperature with goat anti-rabbit  
258 IgG-HRP (1:5000) (Thermo Fisher Scientific) in blocking buffer. The membrane was washed  
259 twice with PBS-T followed by incubation with Amersham ECL Western Blotting Detection  
260 Reagents (Cytiva). Western blots were analyzed on a Biorad Chemidoc Imaging System (Biorad  
261 Laboratories). Some SDS-PAGE gels were stained with Coomassie Brilliant Blue (Sigma-  
262 Aldrich) and imaged with a Gel Logic 112 Imaging System (Kodak, Rochester, NY).

## 263 **2.6 CD4<sup>+</sup> T cell Isolation and Apoptosis Assay**

264 Primary naïve CD4<sup>+</sup> T cells were isolated from the spleen, lymph nodes and thymus of 6–8-  
265 week-old male and female C57BL/6 WT mice (Jackson Laboratories, Bar Harbor, ME). Naïve  
266 CD4<sup>+</sup> T cells were isolated using the Mojosort Mouse CD4 Naïve T Cell Isolation Kit  
267 (Biolegend, San Diego, CA) using LS columns on a QuadroMACS magnet (Miltenyi Biotec,  
268 Bergisch Gladbach, North Rhine-Westphalia, Germany).  $5 \times 10^5$  cells were plated per well of a  
269 48-well plate coated with CD3 (5 µg/ml) (Biolegend) and cultured in regular T cell media (RPMI  
270 1640 supplemented with 10% heat inactivated FBS (Thermo Fisher Scientific), 1% Penicillin  
271 (10,000 U/ml) (Thermo Fisher Scientific), 1% Streptomycin (10,000 µg/ml) (Thermo Fisher  
272 Scientific), 1% 100x MEM NEAA (Thermo Fisher Scientific), 1% 200 mM L-glutamine  
273 (Thermo Fisher Scientific), 55 µM β-mercaptoethanol (Thermo Fisher Scientific), CD28 (1  
274 µg/ml) (Biolegend, San Diego, CA), and IL-2 (20 ng/ml) (Biolegend)) for naïve T cells (Th0) or  
275 polarized to Th1 phenotype by culturing in T cell media additionally supplemented with IL-12  
276 (20 ng/mL) and anti-IL-4 (10 µg/ml) (Biolegend). After 48 h, cells were transferred to a non-  
277 CD3 coated plate and incubated for an additional three days before activation with Cell  
278 Activation cocktail with Brefeldin A (Biolegend) for 6 h and collection. To analyze apoptosis,  
279 naïve and Th1 cells were counted and plated in a 48-well plate at  $5 \times 10^5$  cells per well. Cells were  
280 incubated overnight to acclimate and then treated with either 1 µM Staurosporine (Sigma-  
281 Aldrich), dPBS (Thermo Fisher Scientific), 1 µM rBma-LEC-1 or 1 µM rBma-LEC-2. 24 h post-  
282 treatment, cells were collected and stained using the eBioscience Annexin V Apoptosis  
283 Detection Kit APC (Thermo Fisher Scientific) according to manufacturer's instructions. Tim-3  
284 was neutralized using *InVivo*MAb anti-mouse Tim-3 antibodies (10µg/mL) (Bio X Cell,  
285 Lebanon, NH) for 1 h prior to rBma-LEC-1 or rBma-LEC-2 treatment.

## 286 **2.7 Macrophage Polarization Assay**

287 The *Homo sapiens* monocyte derived THP-1 cell line (ATCC, Manassas, VA) was maintained in  
288 RPMI 1640 supplemented with 10% heat inactivated FBS, 1% 1M HEPES, 1% 100mM Sodium  
289 Pyruvate, 1% Penicillin (10,000 U/ml) 1% Streptomycin (10,000 ug/ml), 1 µg/ml Amphotericin  
290 B, 1.5 g/L Sodium Bicarbonate, and 4.5 g/L glucose (all Thermo Fisher Scientific) at 37°C with  
291 5% CO<sub>2</sub>. THP-1 monocytes were seeded at 5x10<sup>5</sup> per well of a 12-well plate (Thermo Fischer  
292 Scientific) and transitioned to macrophages by treatment with 80 nM Phorbol 12-myristate 13-  
293 acetate (PMA) for 2 h. Following a 24 h resting period, media was changed and cells were  
294 treated with either dPBS (control) (Thermo Fisher Scientific), 50 ng/ml IFN $\gamma$  (Biolegend) + 100  
295 ng/ml Lipopolysaccharide (LPS) (Sigma-Aldrich) for polarization to M1 phenotype, 20 ng/ml  
296 IL-4 + 20 ng/ml IL-13 (Biolegend) for polarization to M2, 0.5 µM rBma-LEC-1, 0.5 µM rBma-  
297 LEC-2 or a combination of cytokines and recombinant galectin. To investigate whether Bma-  
298 LEC-1 and Bma-LEC-2 were functioning through the Tim-3 receptor, Tim-3 was either  
299 neutralized by anti-human Tim-3 antibodies (10 µg/mL) (Biolegend) for 1 h prior to treatment or  
300 through knockdown via duplexed siRNA (Integrated DNA Technologies, Coralville, IA)  
301 (Supplemental Materials 1) treatment for 24 h prior to treatment. Cells were incubated for 72 h  
302 and then collected in Trizol for analysis of M1 and M2 markers using RT-qPCR as previously  
303 described except the High-Capacity cDNA Reverse Transcription Kit (Thermo Fisher Scientific)  
304 was used according to manufacturer's instructions for cDNA synthesis. Expression of *TNF $\alpha$* ,  
305 *CXCL10*, *CD80*, *MCP-1*, *IL-10*, *CCL13* and *CCL22* were normalized to the housekeeping gene  
306 *RPL37A* (Supplemental Materials 1).

## 307 **2.8 Enzyme-linked Immunosorbent Assay (ELISA)**

308 Supernatants from treated macrophage samples were collected for quantification of IL-10. An  
309 ELISA MAX Deluxe Set Human IL-10 kit (Biolegend) was used according to manufacturer's  
310 instructions. Briefly, IL-10 capture antibody was coated to a 96-well plate and incubated at 4°C  
311 overnight. The next day the plate was washed four times with wash buffer (dPBS + 0.05%  
312 Tween-20) (Thermo Fisher Scientific) then blocked for 1 h at room temperature with assay  
313 diluent. Following, the plate was washed four times with wash buffer and 100 µl of standard or  
314 sample was added per well and incubated at room temperature for 2 h. After, the plate was  
315 washed a further four times and IL-10 detection antibody was added and incubated for 1 h.  
316 Following, the plate was washed four times and Avidin-HRP added for 30 min. After the plate  
317 was washed five times and a 3,3',5,5'-Tetramethylbenzidine solution (Biolegend) was prepared  
318 and incubated for 30 min. Immediately after, stop solution was added and the plate was read on a  
319 SpectraMax M2e plate reader (Molecular Devices, San Jose, CA, USA).

## 320 **2.9 Statistical Analysis**

321 Gene expression assays were analyzed using a Two-way ANOVA with a Tukey multiple  
322 comparisons test. Apoptosis assays were analyzed using a Two-Way ANOVA Mixed Effects  
323 Analysis. Multiple comparisons were analyzed with a Šidák statistical hypothesis testing method.  
324 Macrophage polarization qPCR assays were analyzed using an Ordinary One-Way ANOVA and  
325 a Dunnett multiple comparison test. ELISA data was analyzed using a Mixed Effects Analysis  
326 model with a Holm-Šidák multiple comparison test. For all significance testing p-values < 0.05  
327 was considered significant. All ANOVAs were completed using Graphpad prism 9.3.1  
328 (Graphpad Software, San Diego, CA).

329

### 330 **3. Results**

#### 331 **3.1 Bma-LEC-1 and -2 expression and secretion are sex- and life stage-specific**

332 We identified Bma-LEC-1 and Bma-LEC-2 as amongst the most abundant cargo proteins in EVs  
333 isolated from mature adult female *B. malayi* spent culture media but absent from EVs secreted by  
334 adult male or L3 stage parasites (21,23). Here we used RT-qPCR to further examine the  
335 expression profile of both Bma-LEC-1 and Bma-LEC-2 across life stages of *B. malayi*. We  
336 found that, consistent with our proteomic analysis of secreted EVs, *Bma-LEC-1* and *Bma-LEC-2*  
337 expression was highest in adult female *B. malayi*. *Bma-LEC-1* was expressed approximately 24  
338 fold higher in adult females than both adult males ( $p = 0.0345$ ,  $N = 3$ ) and microfilariae ( $p =$   
339  $0.0338$ ,  $N = 3$ ) and 20 fold higher than in infective L3 ( $p = 0.0357$ ,  $N=3$ ). Adult males, infective  
340 L3 and microfilariae all had similar levels of *Bma-LEC-1* expression. Expression of *Bma-LEC-2*  
341 was also highest in adult female stages and although not statistically significant due to higher  
342 variability, adult females expressed *Bma-LEC-2* approximately five fold higher than adult males  
343 ( $p = 0.6286$ ,  $N = 3$ ), seven fold higher than microfilariae ( $p = 0.5746$ ,  $N = 3$ ), and nineteen fold  
344 higher than L3 ( $p = 0.4973$ ,  $N = 3$ ) (Fig 1A).

345 Bma-LEC-1 and Bma-LEC-2 do not contain signal peptide sequences such that their secretion  
346 into the host would require a non-canonical pathway; their identification in EVs is consistent to  
347 this. To further explore this mechanism of parasite galectin secretion, we used western blot to  
348 examine galectin expression in whole worm lysates, secreted EVs and also in EV-depleted  
349 secretory products of each life stage of *B. malayi* using an antibody raised against Bma-LEC-2  
350 (52). It has been reported, however, that this antibody has affinity to other *B. malayi* galectins  
351 and should perhaps be viewed as a general *B. malayi* galectin antibody. Pilot experiments using



352 recombinant Bma-LEC-2 determined that we could detect parasite galectins at levels as low as 3  
353 ng (Fig 1B). *B. malayi* galectins were clearly identified from whole worm lysates of adult female  
354 and adult male parasites (Fig 1C). Reduced activity band was observed in whole worm lysate  
355 from microfilariae and almost none identified from L3 stage parasites. These data align well to  
356 the combined gene expression profiles of Bma-LEC-1 and Bma-LEC-2 that indicated highest  
357 galectin expression in adult stages. Galectins were also identified in protein isolated from adult  
358 female EVs, but not from EVs of any other life stage (Fig 1D). Again, this corroborates previous  
359 proteomic analyses of *B. malayi* EVs by our group and others and indicates that although  
360 galectins are being expressed endogenously, EV secretion is only by the adult female stage and  
361 hints more broadly that cargo selection and loading into EVs may be both selective and sex  
362 specific. Protein was concentrated from EV-depleted secretory products of each life stage  
363 representing proteins that are freely secreted from the parasites. Galectins were again identified  
364 in the freely secreted products of adult females and adult male parasites (Fig 1E) but  
365 surprisingly, strong reactivity was also identified in microfilariae EV-depleted secretions. Given  
366 that Bma-LEC-1 and -2 lack signal sequences, our observation of galectins in freely secreted  
367 proteins could result from EVs rupturing during sample preparation or from non-canonical  
368 secretory pathways other than EVs contributing to galectin release. The very strong reactivity in  
369 microfilariae EV-depleted products might also support this.

### 370 **3.2 *B. malayi* galectins are related to other tandem-repeat type galectins**

371 Clustal Omega software (53), with default settings, was used for multiple sequence alignment of  
372 selected mammalian and invertebrate galectins and c-type lectins and color coded according to  
373 Clustalx parameters. The protein sequence of *B. malayi* galectins has high similarity to other  
374 galectins found within filarial species (52), however, knowledge on the functions of this filarial

375 nematode galectin family is lacking. A phylogenetic analysis of Bma-LEC-1 and Bma-LEC-2  
376 was conducted to aid in the identification of potential functions. Bma-LEC-1 and Bma-LEC-2  
377 were compared to galectins from *Caenorhabditis elegans*, *Drosophila melanogaster*, *Homo*  
378 *sapiens* and *Mus musculus*. A C-type lectin from each species was included to explore the  
379 relationship between Bma-LEC-1, Bma-LEC-2 and other carbohydrate binding protein types. Of  
380 the sequences used in our analysis, we found that Bma-LEC-1 and Bma-LEC-2 are most closely  
381 related to a *C. elegans* tandem-repeat type galectin, but also clustered with the tandem-repeat  
382 type galectins of humans and mice (Fig. 2A). Focusing our analysis on these tandem-repeat type  
383 galectins, we identified that Bma-LEC-1 and Bma-LEC-2 are most similar to galectin-9 proteins  
384 (Fig. 2B). Further, the similarity of the two characteristic carbohydrate recognition domains  
385 (CRDs) of the various galectins was evaluated through multiple sequence alignment (Fig. 2C-D).  
386 We found that within these critical CRDs, Bma-LEC-1 had the most similarity to *C. elegans*  
387 LEC-1 with 97% cover (percent of the query sequence found within the target sequence) and  
388 83% identity (how similar the sequences are). Bma-LEC-1 also had high similarity to  
389 human/mouse galectin-9 CRDs with 94% cover and 60% identity and mouse galectin-4 with  
390 92% cover and 52% identity. We also found that Bma-LEC-2 had highest similarity to *C.*  
391 *elegans* LEC-1 with 99% cover and 71% identity. Bma-LEC-2 also had high similarity to  
392 human/mouse galectin-9 with 92% cover and 59% identity and to human/mouse galectin-4 with  
393 92% cover and 58% identity. These data suggest that Bma-LEC-1 and -2 are tandem-repeat type  
394 galectins and, compared to the more well understood mammalian galectins, are most similar to  
395 mammalian galectin-9.

### 396 **3.3 rBma-LEC-1 and rBma-LEC-2 are functional homologs of mammalian galectin-9**

397 Following cloning (Fig. 3A) and expression, recombinant protein was isolated from Sf21 cell  
398 lysates and initially purified on a Ni-NTA Resin column to bind a C-terminal His-tag. SDS-  
399 PAGE gel electrophoresis stained with Coomassie Blue revealed two distinct proteins of  
400 approximately 32 kDA in size from the elution fraction of our Ni-NTA column (Fig. 3B). Size  
401 exclusion chromatography on a FPLC system was used as a secondary additional technique to  
402 remove non-specific proteins and ensure the purity of our recombinant galectins for downstream  
403 analysis. Only FPLC fractions that contained no debris or other non-specific proteins and  
404 contained the protein of interest were used and further concentrated (Fig. 3C). Concentrated,  
405 purified proteins were confirmed by western blot using an HRP conjugated 6x-His Tag  
406 monoclonal antibody (Fig. 3D).

407 Hemagglutination (HA) and hemagglutination inhibition (HI) assays were used to obtain semi-  
408 quantitative data on the carbohydrate binding and specificities of rBma-LEC-1 and rBma-LEC-2.  
409 An HA assay was used to determine if rBma-LEC-1 and rBma-LEC-2 were expressed accurately  
410 and had produced functional proteins. Initial experiments confirmed that rBma-LEC-1 and  
411 rBma-LEC-2 were functional and capable of binding carbohydrates on the surface of rabbit  
412 erythrocytes at amounts as low as 1.5 ng and 7 ng respectively (Supplemental Materials 2). An  
413 HI assay was conducted to determine whether rBma-LEC-1 and rBma-LEC-2 had similar  
414 carbohydrate binding profiles to mammalian galectin-9, with a panel of common carbohydrates  
415 including 1 M galactose, 900 mM N-acetylgalactosamine (GalNAc), 1 M lactose, 32.6 mM N-  
416 acetylglucosamine (GlcNAc), 2 M mannose, and 2 M glucose chosen for initial investigation.  
417 The ability of rBma-LEC-1, rBma-LEC-2, human galectin-9 and mouse galectin-9 to bind RBCs  
418 were all inhibited by the presence of galactose, GalNAc, lactose and GlcNAc, confirming  
419 carbohydrate binding by these galectins. This was as expected since binding these carbohydrates

420 are properties common to lectin-type proteins (48). In addition, the ability of rBma-LEC-1,  
421 rBma-LEC-2, human galectin-9 and mouse galectin-9 to bind RBCs was not inhibited by glucose  
422 or mannose (Fig 4A). Again, this was expected as these sugars are not common binding targets  
423 of tandem-repeat galectins (54,55). The affinities of these galectins to galactose, GalNAc,  
424 lactose, and LacNAc were further investigated by determining the minimal inhibitory  
425 concentration (MIC) of the carbohydrate solution that could still inhibit hemagglutination. The  
426 MIC of galactose for human galectin-9 and mouse galectin-9 was determined to be 125 mM and  
427 62.5 mM respectively. rBma-LEC-2 was similar with a MIC of 125 mM but rBma-LEC-1 bound  
428 galactose with greater sensitivity (MIC < 488  $\mu$ M). The MIC of GalNAc for both human and  
429 mouse galectin-9 was 112.5 mM, while rBMA-LEC-2 had a MIC of 450 mM; again, rBma-LEC-  
430 1 had the highest sensitivity for GalNAc binding with a MIC of < 440  $\mu$ M. There was more  
431 variation in the galectin's ability to bind to lactose as compared to other carbohydrates. Human  
432 galectin-9 and rBma-LEC-1 had a MIC for lactose of < 488  $\mu$ M, while mouse galectin-9 and  
433 rBma-LEC-2 had MICs of 4 mM and 15.6 mM respectively. All galectins tested had the lowest  
434 MIC and thus highest sensitivity to LacNAc with human galectin-9 and rBma-LEC-1 having a  
435 MIC of < 255  $\mu$ M and mouse galectin-9 and rBma-LEC-2 a MIC of 2 mM (Fig 4B-C) the lowest  
436 MIC of any of the carbohydrates tested.

437 HA and HI assays are robust but not high throughput so a glycan-binding array was performed to  
438 comprehensively profile the binding specificities of rBma-LEC-1 and rBma-LEC-2 compared to  
439 mammalian, tandem-repeat type galectins. Glycan binding array data was compared to archived  
440 data of human galectin-4, galectin-8, galectin-9 and galectin-12 available at the National Center  
441 for Functional Glycomics (<https://ncfg.hms.harvard.edu/>). rBma-LEC-1 and rBma-LEC-2 had  
442 the most similar glycan binding patterns to human galectin-8 and human galectin-9 (Fig. 4D).

443 These parasite galectins shared mammalian galectin-8 and -9 ability to bind to Gala1-2Galb-  
444 CH<sub>2</sub>CH<sub>2</sub>CH<sub>2</sub>NH<sub>2</sub>, Gala1-3(Fuca1-2)Galb1-3GlcNAcb-CH<sub>2</sub>CH<sub>2</sub>NH<sub>2</sub>, Gala1-3(Fuca1-2)Galb1-  
445 4(Fuca1-3)GlcNAcb-CH<sub>2</sub>CH<sub>2</sub>CH<sub>2</sub>NH<sub>2</sub>, Galb1-4(Fuca1-3)GlcNAcb1-2Mana1-6(Galb1-  
446 4(Fuca1-3)GlcNAcb1-2Mana1-3)Manb1-4GlcNAcb1-4(Fuca1-6)GlcNAcb-NST, GlcNAcb1-  
447 3Galb1-4GlcNAcb1-6(GlcNAcb1-3)Galb1-4GlcNAc-CH<sub>2</sub>CH<sub>2</sub>NH<sub>2</sub>, and Galb1-3GlcNAcb1-  
448 3Galb1-4GlcNAcb1-2Mana1-6(Galb1-3GlcNAcb1-3Galb1-4GlcNAcb1-2Mana1-3)Manb1-  
449 4GlcNAcb1-4GlcNAc-VANK. This strong glycan binding congruency indicates that rBma-LEC-  
450 1 and rBma-LEC-2 may have the ability to phenocopy human galectin-8 and galectin-9 if  
451 secreted by the parasite into similar contexts as the endogenous host galectins. The full glycan  
452 binding array data for rBma-LEC-1 and rBma-LEC-2 can be found in Supplemental Materials 3  
453 with a key provided in Supplemental Materials 4. Overall, rBma-LEC-1 was able to bind to more  
454 glycans on the array than rBma-LEC-2. Both recombinant galectins had a particularly high  
455 affinity for O-glycan and N-glycan motifs that form blood group B antigens. More specifically,  
456 out of all the glycans assayed, rBMA-LEC-1 had the highest affinity to alpha-galactose on a  
457 biantennary N-glycan, to blood group B on a biantennary N-glycan, and to blood group B on  
458 multiple O-glycan and N-glycan motifs while rBma-LEC-2 had the highest affinity to blood  
459 group B, to blood group B on biantennary N-glycans, to alpha-galactose on biantennary N-  
460 glycans, and to various O-glycan and N-glycan motifs. Structures of the glycans that rBma-LEC-  
461 1 and rBma-LEC-2 had the highest affinity for can be found in Figure 5.

### 462 **3.4 rBma-LEC-2, but not rBma-LEC-1, induces immunomodulatory phenotypes seen in** 463 **chronic filarial infection**

464 Mammalian galectin-9 is a known immunomodulatory molecule and promotes suppressive or  
465 regulatory phenotypes in both lymphoid and myeloid immune cells. For example, it has been

466 shown that mammalian galectin-9 can induce apoptosis in CD4<sup>+</sup> Th1 cells (56–59) and promote  
467 polarization of macrophages to an alternatively activated or M2 phenotype (59–62). These  
468 phenotypes, among others elicited by galectin-9, are consistent with the modifications of the  
469 initial type 2 immune response seen during chronic filarial infection. Due to the similar glycan  
470 binding profiles of Bma-LEC-1, Bma-LEC-2 and mammalian galectin-9 we wanted to  
471 investigate whether parasite-derived galectins could induce similar phenotypes. To investigate  
472 whether rBma-LEC-1 and rBma-LEC-2 could induce apoptosis in Th1 cells, primary naïve CD4<sup>+</sup>  
473 T cells were isolated from the spleens, lymph nodes and thymus of C57BL/6 mice and a subset  
474 polarized to Th1. Both naïve and Th1 cells were treated with rBma-LEC-1 and rBma-LEC-2 and  
475 apoptosis was detected using Annexin V conjugation and quantified with flow cytometry. Our  
476 ability to measure apoptosis using this approach was confirmed using 1  $\mu$ M staurosporine as a  
477 positive control, which increased apoptosis in naïve and Th1 cells by 49% and 44%, respectively  
478 ( $p < 0.0001$ ,  $N = 8$ ) compared to negative control CD4<sup>+</sup> cells treated with dPBS. Treatment with  
479 1  $\mu$ M rBMA-LEC-1 significantly increased apoptosis in Th1 cells by 13% as compared to rBma-  
480 LEC-1 treated naïve T cells ( $p = 0.0137$ ,  $N = 6$ ), while treatment with rBma-LEC-2 significantly  
481 increased apoptosis in Th1 cells by 20% as compared to rBma-LEC-2 treated naïve T cells ( $p <$   
482  $0.0001$ ,  $N = 7$ ). However, only rBma-LEC-2, not rBma-LEC-1, treated Th1 cells had  
483 significantly higher apoptosis than negative control Th1 cells. rBma-LEC-2 treated Th1 cells had  
484 a 15% increase ( $p = 0.0059$ ,  $N = 7$ ) in apoptosis as compared to negative control Th1 cells (Fig.  
485 6A). This data support the conclusion that although rBma-LEC-1 displays an *in vitro* glycan  
486 binding profile similar to mammalian galectin-9, it does not phenocopy the reported functional  
487 effects of galectin-9 in this assay. In contrast, the similar rBma-LEC-2 does phenocopy and can  
488 selectively induce apoptosis in Th1 cells, but not naïve CD4<sup>+</sup> T cells. The mechanism of

489 apoptosis induction in Th1 cells by mammalian galectin-9 is known to involve binding T cell  
490 immunoglobulin and mucin domain-containing protein 3 (Tim-3) on the surface of CD4<sup>+</sup> T cells  
491 (56). To determine if rBma-LEC-2 utilizes the same receptor to induce apoptosis we neutralized  
492 the Tim-3 receptor by treatment with anti-mouse Tim-3 antibodies. Neutralization of Tim-3 did  
493 not abrogate the effects of rBma-LEC-2 as expected (Fig. 6A), suggesting either that the  
494 antibody is not fully preventing the binding of Bma-LEC-2 or that Bma-LEC-2 is mediating its  
495 effects through alternative pathways. To explore this further we attempted to use RNAi to  
496 suppress Tim-3 receptor expression, however, we were unable to maintain isolated T cells  
497 sufficiently in culture to enable this approach.

498 Further to inducing apoptosis in Th1 cells, galectin-9 is known to elicit alternative activation  
499 phenotypes in macrophages. To test the hypothesis that rBma-LEC-1 and rBma-LEC-2 can  
500 phenocopy galectin-9 and also drive macrophage polarization, THP-1 cells, a human monocyte  
501 cell line, were differentiated to macrophages using PMA and then treated with either rBma-LEC-  
502 1 or rBMA-LEC-2 alone. Polarization was analyzed by quantifying expression of common M1  
503 and M2 macrophage markers including *TNF $\alpha$* , *CXCL10*, *CD80*, *MCP-1*, *IL-10*, *CCL13* and  
504 *CCL22*. Treatment with rBma-LEC-1 or rBma-LEC-2 did not promote polarization to the  
505 classically activated (M1) phenotype as indicated by the lack of expression of any of the M1  
506 markers (Supplemental Materials 5A-C), however, treatment with rBma-LEC-2 alone did  
507 significantly increase expression of one M2 marker, *IL-10*, but not others (*MCP-1*, *CCL13* or  
508 *CCL22*, see Supplemental Materials 5D-F). Focusing on this phenotype, we found that treatment  
509 of macrophages with rBma-LEC-1 had no effect on expression of *IL-10* ( $p = 0.9997$ ,  $N = 10$ ),  
510 but treatment with rBma-LEC-2 significantly increased expression by 213% ( $p = 0.0411$ ,  $N =$   
511 13) (Fig 6B). To determine if there was any synergistic effect of parasite galectin treatment

512 alongside traditional M2 polarization using IL-4 and IL-13 we treated macrophages with each  
513 parasite-derived galectin in combination with IL-4 and IL-13. Treatment with the combinations  
514 of rBma-LEC-1/IL-4/IL-13 and rBma-LEC-2/IL-4/IL-13 significantly increased expression of  
515 *IL-10* by 379% ( $p = 0.0010$ ,  $N = 7$ ) and 366% ( $p < 0.0001$ ,  $N = 12$ ), respectively (Fig. 6B) but  
516 did not appear synergistic as *IL-10* expression following both treatments was not significantly  
517 higher than for IL-4/IL-13 alone ( $p = 0.7409$ ,  $N = 7$  and  $p = 0.4602$ ,  $N = 12$ , respectively). To  
518 evaluate whether rBma-LEC-2 driven increase in *IL-10* expression was mediated through Tim-3,  
519 the Tim-3 receptor was both neutralized using anti-human Tim-3 antibody or was knocked down  
520 by treatment with siRNA (in contrast to our T cell work, the longevity of differentiated  
521 macrophages in culture allowed this approach) (Supplemental Materials 6). Neither  
522 neutralization ( $p = 0.9962$ ,  $N = 4$ ) nor *Tim-3* knock down ( $p = 0.1112$ ,  $N = 3$ ) abrogated the  
523 effects of rBma-LEC-2 (Fig. 6B). From the antibody data, one may again conclude either that the  
524 antibody is not fully preventing the binding and therefore not fully inhibiting the effects of  
525 rBma-LEC-2 on *IL-10* expression, or that Bma-LEC-2 is not mediating its effects through Tim-3.  
526 For the siRNA approach we had expected Tim-3 knockdown to abrogate the effects of Bma-  
527 LEC-2, however, it has been shown that silencing Tim-3 on monocytes can increase *IL-10*  
528 expression (63,64). Our data revealed a similar trend in that treatment with either siRNA +  
529 rBma-LEC-2 ( $p = 0.0008$ ,  $N = 3$ ) or treatment with siRNA only ( $p = 0.0059$ ,  $N = 3$ ) increased  
530 expression of *IL-10* as compared to naïve macrophages. In addition, neither treatment was  
531 statistically different from treatment with rBma-LEC-2 only.

532 In addition to analyzing *IL-10* at the transcriptional level, we also analyzed IL-10 production at  
533 the protein level using ELISA. In correlation with the gene expression data, rBma-LEC-1 did not  
534 have any effects at all on IL-10 production ( $0.7600$ ,  $N = 4$ ) while rBma-LEC-2 significantly



535 increased IL-10 production by 312% ( $p = 0.0262$ ,  $N = 9$ ) (Fig. 6C). Again, in strong congruence  
536 with the transcriptional data, we did not observe any synergistic effects of either parasite galectin  
537 in combination with IL-4/IL-13 (Fig. 6C). Neither treatment with anti-Tim-3 antibody ( $p =$   
538  $0.3650$ ,  $N=3$ ) nor treatment with Tim-3 siRNA ( $p = 0.3838$ ,  $N =3$ ) abrogated the effects of  
539 rBma-LEC-2 (Fig. 6C) but we again saw that treatment with siRNA + rBma-LEC-2 ( $p = 0.0262$ ,  
540  $N = 3$ ) and treatment with siRNA only ( $p = 0.0223$ ,  $N = 3$ ) significantly increased production of  
541 IL-10 (Fig. 6C). Collectively, our data show that rBma-LEC-1 does not exhibit bioactivity in the  
542 *in vitro* Th1 apoptosis and macrophage differentiation assays used here but rBma-LEC-2 is  
543 bioactive, promoting apoptosis of Th1 cells but not naïve, native CD4<sup>+</sup> cells and increasing  
544 expression of IL-10 in human macrophages. This activity phenocopies the reported functions of  
545 endogenous human galectin-9. The mechanism of action of rBma-LEC-2 is unclear but our data  
546 do support Tim-3 involvement. Tim-3 is an inhibitory receptor (65–69) and suppression of its  
547 expression in macrophages by siRNAs removes that brake to increase *IL-10* expression.  
548 Similarly, galectins act to bind Tim-3 and sequester its activity through their lattice-forming  
549 nature. This would also remove the Tim-3 mediated inhibition of *IL-10* expression and we see  
550 that effect in our IL-10 assays.

551

## 552 **4. Discussion**

553 The immunosuppressive phenotypes induced by Bma-LEC-2 give new insight into some of the  
554 mechanisms filarial parasites utilize to establish and maintain chronic infection. Hallmarks of  
555 chronic filarial infections include an increase in alternatively activated macrophage (3–5) and  
556 CD4<sup>+</sup> CD25<sup>+</sup> regulatory T cell (5–10) populations, increases in IL-4 and IL-10 (11–13), and a

557 reduction in or a hyporesponsiveness of T cells (14–17). The outcome of these modifications is  
558 to create a state of immune tolerance where the host can maintain an active immune response,  
559 but damage to the parasite is limited. Here we have shown that protein cargo within parasite-  
560 derived EVs, specifically a parasite-derived galectin-9 homolog (Bma-LEC-2), can induce  
561 polarization of macrophages to an alternatively activated phenotype, increase *IL-10* expression in  
562 macrophages and induce apoptosis in Th1 cells.

563 The concept of filarial and other parasitic nematodes evolutionarily adapting to produce  
564 homologs of host molecules to aid in their survival has been documented. *B. malayi* secrete a  
565 homolog of the human cytokine macrophage migration inhibitory factor homolog 1 (MIF-1) that  
566 can phenocopy the host molecule to induce chemotaxis of human monocytes (70,71) and  
567 increase production of IL-8 and TNF $\alpha$  in those cells (70). Many filarial species also secrete a  
568 homolog to host cystatins, a cysteine protease inhibitor. Onchocystatin, from *Onchocerca*  
569 *volvulus*, has immunomodulatory effects on human monocytes as indicated by its ability to  
570 suppress proliferation and increase production of IL-10 in human PBMCs (72). In *B. malayi*,  
571 secretion of BmCPI-2 inhibits the antigen presentation abilities of human B cell lines (73). Other  
572 host cytokine homologs secreted by *B. malayi* include asparaginyl-tRNA synthetase, a structural  
573 homolog to human IL-8, and tgh-2, a homolog to human TGF $\beta$ . In a T-cell transfer colitis mouse  
574 model, asparaginyl-tRNA synthetase induced IL-10 production in splenic cells and mice treated  
575 with this protein showed resolution of cellular infiltration in their colonic mucosa and induced a  
576 CD8<sup>+</sup> cellular response (74). *B. malayi* tgh-2 can bind the TGF $\beta$  receptor in mink epithelial cells  
577 and activates plasminogen activator inhibitor-1 expression, a marker for TGF $\beta$ -mediated  
578 transduction (75). These phenotypes show that parasite-derived homologs of host  
579 immunoregulatory molecules can create an overall state of hyporesponsiveness in immune cells

580 that represents a benefit to the parasite. Our findings continue to document this strategy with *B.*  
581 *malayi* adult females producing a homolog of mammalian galectin-9 that induce  
582 immunoregulatory phenotypes in mammalian immune cells.

583 The diverse and important roles that host galectins have in immunomodulation make them  
584 effective molecules for the parasite to mimic; the  $\beta$ -galactoside binding properties of galectins  
585 give them a wide range of cell types which they can target and secretion of parasite galectins into  
586 the host milieu may be an evolutionarily conserved strategy. While we have shown that *B.*  
587 *malayi* adult females secrete EVs containing a bioactive galectin that can drive  
588 immunosuppressive phenotypes, they are not the only filarial nematode to utilize galectins to  
589 potentially modulate their environment and promote survival. *Dirofilaria immitis* produce a  
590 galectin-like protein that can bind plasminogen and stimulate plasmin generation by tissue  
591 plasminogen activator on canine endothelial cells, therefore activating the host fibrinolytic  
592 system (76) and stimulating the degradation of extracellular matrix via the host  
593 plasminogen/plasmin system (77). In addition to filarial nematodes, gastrointestinal nematodes  
594 have also been shown to secrete galectins. The infective L3 stage larvae of the gastrointestinal  
595 nematode *Haemonchus contortus* produces several galectin-like proteins with at least one  
596 possessing eosinophil chemokine activity (78). Another study has shown that *H. contortus*  
597 produces Hco-GAL-1, a galectin like protein, that can increase production of IL-10 from goat  
598 monocytes, inhibit T cell proliferation and induce apoptosis in goat T cells (79), phenotypes  
599 consistent with those we have described for Bma-LEC-2. In addition, *Toxascaris leonine*, an  
600 Ascarid of canines and felines, produces a galectin-9 homolog based on its structure and CRD  
601 sequence (80). This galectin was shown to increase concentrations of TGF $\beta$  and IL-10 in

602 pretreated dextran sulfate sodium (DSS) treated mice (81) promoting an immunosuppressive  
603 environment.

604 The functional role for galectin-9 driving an IL-10 regulatory environment is not just relevant at  
605 the host-helminth interface but is fundamental to host-pathogen interactions more generally.

606 Many studies have shown that there is increased expression of galectin-9 in chronic Hepatitis C  
607 Virus (HCV) infected patients (82–84) with patients displaying an increased expansion of  
608 regulatory T cell populations and a contraction of CD4<sup>+</sup> effector T cells (82,83). An *in vitro*  
609 study examining HCV infected human hepatocytes co-cultured with CD4<sup>+</sup> T cells showed that  
610 the CD4<sup>+</sup> T cells had increased expression of galectin-9, TGFβ and IL-10, indicating viral  
611 infection was driving regulatory phenotypes (84). This study suggested that the virus itself is  
612 modulating host immunity through the use of galectin-9. A similar phenotype was seen in human  
613 dendritic cells (DC) infected with Dengue virus. In this context, infection with dengue virus  
614 specifically increases mRNA and protein levels of galectin-9 (85).

615 Our data are consistent with the effects of Bma-LEC-2 being mediated, at least in part, by the  
616 Tim-3 receptor, similar to mammalian galectin-9. However, studies on mammalian galectin-9  
617 have indicated that mammalian galectin-9 can interact with other receptors also resulting in  
618 immunomodulatory effects. For example, mammalian galectin-9 can bind CD44 on T cells  
619 thereby inhibiting the binding of hyaluronan (HA) to CD44 (86,87). In a study using a murine  
620 model of allergic asthma it was shown that mammalian galectin-9 can modulate CD44-  
621 dependent leukocyte recognition of the extracellular matrix leading to a reduction in airway  
622 hyperresponsiveness (86). Similarly, mammalian galectin-9 suppressed binding of HA to CD44  
623 on melanoma and colon cancer cell lines resulted in suppression of both attachment and invasion  
624 of tumor cells by inhibiting their binding of adhesive molecules to ligands on vascular

625 endothelium and the extracellular matrix (87). In a viral study, mammalian galectin-9 was  
626 identified as a novel binding partner of Epstein-Barr virus latent membrane protein 1 (LMP1)  
627 from nasopharyngeal carcinomas (88). These studies provide evidence that mammalian galectin-9  
628 uses various binding partners each resulting in an immunomodulatory phenotype. Further  
629 investigation into additional potential binding partners of Bma-LEC-2 is therefore necessary to  
630 truly understand the extent of its immunomodulatory effects. The glycan binding data presented  
631 here provides a guide for the identification of these partners.

632

## 633 **Figure Legends**

634 **Figure 1. Bma-LEC-1 and Bma-LEC-2 expression and secretion are sex- and life stage-**  
635 **specific.** (A) Bma-LEC-1 and Bma-LEC-2 are most highly expressed in adult female stage  
636 parasites. (B) A monoclonal antibody raised against Bma-LEC-2 (52) can detect recombinant  
637 Bma-LEC-2 (approximately 32 kDa) at quantities as low as 3 ng. (C) Using this antibody,  
638 parasite galectin reactivity was predominantly detected in whole worm lysate of adult female  
639 parasites and to a lesser extent in adult males and microfilariae. (D) Parasites also secrete  
640 galectins into the extracellular milieu and galectin reactivity was detected in isolated  
641 extracellular vesicles (EVs) of adult female parasites and (E) in EV-depleted spent culture media  
642 of microfilariae and to a lesser extent adult female and male parasites.

643

644 **Figure 2. Bma-LEC-1 and -2 are similar to other tandem-repeat type galectins.** (A) Bma-  
645 LEC-1 and Bma-LEC-2 cluster with other tandem-repeat type galectins from diverse species. (B)  
646 Within the tandem-repeat galectins compared, Bma-LEC-1 and Bma-LEC-2 are most closely  
647 related to *C. elegans* LEC-1 and human/mouse galectin-9. (C) Multiple sequence alignment of

648 the two carbohydrate recognition domains characteristic of galectins revealed that Bma-LEC-1  
649 had 83% identity to *C. elegans* LEC-1 and 60% identity to human/mouse galectin-9, while Bma-  
650 LEC-2 had 71% identity to *C. elegans* LEC-1 and 59% and 58% identity to human/mouse  
651 galectin-9, respectively. Jalview (version 2.11.1.4) was used to create phylogenetic trees and  
652 multiple sequence alignment figures.

653

654 **Figure 3. Expression of recombinant Bma-LEC-1 and Bma-LEC-2 in Sf21 cells.** (A) DNA  
655 gel electrophoresis of *Bma-LEC-1* and *Bma-LEC-2* PCR amplicons from *B. malayi* adult female  
656 cDNA. (B) SDS-PAGE gel stained with Coomassie Blue showing elution of rBma-LEC-1 and  
657 rBma-LEC-2 expressing Sf21 cell lysates from initial nickel NTA resin purification and (C) after  
658 double purification using a FPLC system. Only clean FPLC fractions containing the protein of  
659 interest and no other debris or non-specific proteins were used for downstream assays. (D) Final  
660 confirmation of concentrated, double-purified rBma-LEC-1 and rBma-LEC-2 was conducted via  
661 an anti-6x His Tag western blot. Black arrowhead referencing tagged recombinant galectins of  
662 the expected 32 kDa size.

663

664 **Figure 4. rBma-LEC-1/LEC-2 are functional homologs of mammalian galectin-9.** (A)  
665 Hemagglutination inhibition (HI) assay was used to determine the carbohydrate binding  
666 specificities of rBma-LEC-1 and rBma-LEC-2. A panel of common carbohydrates was used to  
667 test if the recombinant proteins were functional galectins. A solid colored well indicates that the  
668 galectin present is not binding to the carbohydrate of interest but is binding the erythrocytes  
669 instead forming a lattice of erythrocytes on the bottom of the well. A well with a dot in the center  
670 indicates that the galectin present is binding the carbohydrate of interest not the erythrocytes

671 allowing them to sediment at the bottom of the well. Both recombinant proteins (top and bottom  
672 left) were capable of binding galactose, GlcNAc, lactose, and LacNAc, each known galectin  
673 substrates. A similar sugar-binding profile was observed with human (top right) and mouse  
674 galectin-9 (bottom right). (B) The binding sensitivity of galectins were determined using a  
675 minimal inhibitory concentration (MIC) of each carbohydrate solution. Wells with a dot in the  
676 center indicate that the galectin is able to bind that concentration of the carbohydrate of interest.  
677 The MIC is determined at the first well where the galectin is no longer able to bind that  
678 concentration of carbohydrate as indicated by a solid colored well. rBma-LEC-1 (top left) had  
679 the highest affinity to all of the carbohydrate solutions tested and all galectins had the highest  
680 affinity to LacNAc. (C) A glycan binding array was used to compare rBma-LEC-1 and rBma-  
681 LEC-2 glycan binding profiles with those of human galectin -4, -8, -9 and -12 using a substrate  
682 of 584 glycan moieties. The glycan binding profiles of the parasite galectins are most similar to  
683 human galectin-8 and galectin-9. Glycan binding arrays are quantified by relative fluorescence  
684 units (RFU). An abbreviated version of this array data is presented with a full analysis found in  
685 Supplemental Materials 3. A corresponding key of glycan names associated with the numerical  
686 IDs is provided in Supplemental Materials 4.

687

688 **Figure 5. Structures of rBma-LEC-1/LEC-2 highest affinity glycans.** The binding affinities  
689 of rBma-LEC-1 and rBma-LEC-2 were investigated with a glycan binding array. rBma-LEC-1  
690 had high affinity for alpha-galactose on a biantennary N-glycan, for blood group B on a  
691 biantennary N-glycan, and for blood group B on multiple O-glycan and N-glycan motifs. rBma-  
692 LEC-2 had high affinity for blood group B, for blood group B on biantennary N-glycans, for  
693 alpha-galactose on biantennary N-glycans, and for various O-glycan and N-glycan motifs. This

694 table shows the structures of the top five highest binding glycans. 1: Gala1-3Galb1-4GlcNAcb1-  
695 2Mana1-6(Gala1-3Galb1-4GlcNAcb1-2Mana1-3)Manb1-4GlcNAcb1-4GlcNAcb-GENR, 2:  
696 Gala1-3Galb1-4GlcNAcb1-2Mana1-6(Gala1-3Galb1-4GlcNAcb1-2Mana1-3)Manb1-  
697 4GlcNAcb1-4GlcNAc-KVANKT, 3: Gala1-3(Fuca1-2)Galb1-4GlcNAcb1-2Mana1-6(Gala1-  
698 3(Fuca1-2)Galb1-4GlcNAcb1-2Mana1-3)Manb1-4GlcNAcb1-4(Fuca1-6)GlcNAcb-NST, 4:  
699 Galb1-4GlcNAcb1-3Galb1-4GlcNAcb1-3Galb1-4GlcNAcb1-3Galb1-4GlcNAcb1-3Galb1-  
700 4GlcNAcb1-2Mana1-6(Galb1-4GlcNAcb1-3Galb1-4GlcNAcb1-3Galb1-4GlcNAcb1-3Galb1-  
701 4GlcNAcb1-3Galb1-4GlcNAcb1-2Mana1-3)Manb1-4GlcNAcb1-4GlcNAcb-VANK, 5: Gala1-  
702 3(Fuca1-2)Galb1-4GlcNAc-CH<sub>2</sub>CH<sub>2</sub>NH<sub>2</sub>, 6: Gala1-3(Fuca1-2)Galb1-3GlcNAcb-  
703 CH<sub>2</sub>CH<sub>2</sub>NH<sub>2</sub>.

704

705 **Figure 6. rBma-LEC-2 induces suppressive phenotypes in lymphoid and myeloid cells.** (A)

706 rBma-LEC-2, but not rBma-LEC-1, is a bioactive effector molecule that selectively induces  
707 apoptosis in Th1 cells, but not naïve T cells and (B) promotes polarization of macrophages to an  
708 alternatively activated phenotype as indicated by its increase in expression and (C) production of  
709 IL-10. These phenotypes are consistent with phenotypes induced by mammalian galectin-9.  
710 There is no synergistic effect in either inducing apoptosis of T cells or promoting polarization of  
711 macrophages when cells are treated with both human cytokines IL-4 and IL-13 and parasite-  
712 derived galectin. These effects may be mediated by T cell immunoglobulin and mucin domain-  
713 containing protein 3 (Tim-3), a known receptor for galectin-9. Suppressing the expression of  
714 Tim-3 with siRNA induced a similar increase in IL-10 as treatment of cells with Bma-LEC-2. N  
715 = 3 (minimum). Mean ± SEM, \*P<0.05, \*\*P<0.01, \*\*\*P<0.001, \*\*\*\*P<0.0001.

716



## 717 **Acknowledgments**

718 *Brugia* life cycle stages were obtained through the NIH/NIAID Filarial Research Reagent  
719 Resource Center (FR3), morphological voucher specimens are stored at the Harold W. Manter  
720 Museum at University of Nebraska, accession numbers P2021-2032.

721

## 722 **References**

- 723 1. World Health Organization. Global programme to eliminate lymphatic filariasis: progress report,  
724 2020 [Internet]. 2021 Oct [cited 2022 Feb 22] p. 12. Available from:  
725 <https://www.who.int/publications-detail-redirect/who-wer9641-497-508>
- 726 2. WHO. Lymphatic filariasis [Internet]. World Health Organization. [cited 2022 Jan 20]. Available  
727 from: <https://www.who.int/news-room/fact-sheets/detail/lymphatic-filariasis>
- 728 3. Anthony RM, Urban JF, Alem F, Hamed HA, Rozo CT, Boucher JL, et al. Memory TH2 cells induce  
729 alternatively activated macrophages to mediate protection against nematode parasites. *Nat Med*.  
730 2006 Aug;12(8):955–60.
- 731 4. Herbert DR, Hölscher C, Mohrs M, Arendse B, Schwegmann A, Radwanska M, et al. Alternative  
732 Macrophage Activation Is Essential for Survival during Schistosomiasis and Downmodulates T  
733 Helper 1 Responses and Immunopathology. *Immunity*. 2004 Sep 1;21(3):455.
- 734 5. Finlay CM, Walsh KP, Mills KHG. Induction of regulatory cells by helminth parasites: exploitation  
735 for the treatment of inflammatory diseases. *Immunological Reviews*. 2014;259(1):206–30.
- 736 6. Taylor MD, LeGoff L, Harris A, Malone E, Allen JE, Maizels RM. Removal of Regulatory T Cell Activity  
737 Reverses Hyporesponsiveness and Leads to Filarial Parasite Clearance In Vivo. *The Journal of*  
738 *Immunology*. 2005 Apr 15;174(8):4924–33.
- 739 7. Taylor MD, van der Werf N, Harris A, Graham AL, Bain O, Allen JE, et al. Early recruitment of  
740 natural CD4<sup>+</sup>Foxp3<sup>+</sup> Treg cells by infective larvae determines the outcome of filarial infection.  
741 *European Journal of Immunology*. 2009;39(1):192–206.
- 742 8. KORTEN S, HOERAUF A, KAIFI JT, BÜTTNER DW. Low levels of transforming growth factor-beta  
743 (TGF-beta) and reduced suppression of Th2-mediated inflammation in hyperreactive human  
744 onchocerciasis. *Parasitology*. 2011 Jan;138(1):35–45.
- 745 9. D’Elia R, Behnke JM, Bradley JE, Else KJ. REGULATORY T CELLS. *J Immunol*. 2009 Feb  
746 15;182(4):2340–8.

- 747 10. Grainger JR, Smith KA, Hewitson JP, McSorley HJ, Marcus Y, Filbey KJ, et al. Helminth secretions  
748 induce de novo T cell Foxp3 expression and regulatory function through the TGF- $\beta$  pathway.  
749 *Journal of Experimental Medicine*. 2010 Sep 27;207(11):2331–41.
- 750 11. King CL, Mahanty S, Kumaraswami V, Abrams JS, Regunathan J, Jayaraman K, et al. Cytokine  
751 control of parasite-specific anergy in human lymphatic filariasis. Preferential induction of a  
752 regulatory T helper type 2 lymphocyte subset. *J Clin Invest*. 1993 Oct;92(4):1667–73.
- 753 12. Nutman TB, Kumaraswami V. Regulation of the immune response in lymphatic filariasis:  
754 perspectives on acute and chronic infection with *Wuchereria bancrofti* in South India. *Parasite*  
755 *Immunology*. 2001;23(7):389–99.
- 756 13. Mangan NE, Fallon RE, Smith P, Rooijen N van, McKenzie AN, Fallon PG. Helminth Infection  
757 Protects Mice from Anaphylaxis via IL-10-Producing B Cells. *The Journal of Immunology*. 2004 Nov  
758 15;173(10):6346–56.
- 759 14. Harnett W, Harnett MM. Lymphocyte hyporesponsiveness during filarial nematode infection.  
760 *Parasite Immunology*. 2008;30(9):447–53.
- 761 15. Hartmann S, Kyewski B, Sonnenburg B, Lucius R. A filarial cysteine protease inhibitor down-  
762 regulates T cell proliferation and enhances interleukin-10 production. *European Journal of*  
763 *Immunology*. 1997;27(9):2253–60.
- 764 16. Jenson JS, O'Connor R, Osborne J, Devaney E. Infection with *Brugia microfilariae* induces apoptosis  
765 of CD4+ T lymphocytes: a mechanism of immune unresponsiveness in filariasis. *European Journal*  
766 *of Immunology*. 2002;32(3):858–67.
- 767 17. Mishra R, Panda SK, Sahoo PK, Bal MS, Satapathy AK. Increased Fas ligand expression of peripheral  
768 B-1 cells correlated with CD4+ T-cell apoptosis in filarial-infected patients. *Parasite Immunology*.  
769 2017;39(4):e12421.
- 770 18. Valadi H, Ekstrom K, Bossios A, Sjostrand M, Lee JJ, Lotvall JO. Exosome-mediated transfer of  
771 mRNAs and microRNAs is a novel mechanism of genetic exchange between cells. *Nature Cell*  
772 *Biology*. 2007 Jun;9(6):654–.
- 773 19. van Niel G, D'Angelo G, Raposo G. Shedding light on the cell biology of extracellular vesicles. *Nat*  
774 *Rev Mol Cell Biol*. 2018 Apr;19(4):213–28.
- 775 20. Buck AH, Coakley G, Simbari F, McSorley HJ, Quintana JF, Le Bihan T, et al. Exosomes secreted by  
776 nematode parasites transfer small RNAs to mammalian cells and modulate innate immunity.  
777 *Nature Communications*. 2014 Nov 25;5(1):5488.
- 778 21. Zamanian M, Fraser LM, Agbedanu PN, Harischandra H, Moorhead AR, Day TA, et al. Release of  
779 Small RNA-containing Exosome-like Vesicles from the Human Filarial Parasite *Brugia malayi*. *PLoS*  
780 *Negl Trop Dis* [Internet]. 2015 Sep 24 [cited 2020 Mar 30];9(9). Available from:  
781 <https://www.ncbi.nlm.nih.gov/pmc/articles/PMC4581865/>

- 782 22. Tritten L, Clarke D, Timmins S, McTier T, Geary TG. *Dirofilaria immitis* exhibits sex- and stage-  
783 specific differences in excretory/secretory miRNA and protein profiles. *Veterinary Parasitology*.  
784 2016 Dec 15;232:1–7.
- 785 23. Harischandra H, Yuan W, Loghry HJ, Zamanian M, Kimber MJ. Profiling extracellular vesicle release  
786 by the filarial nematode *Brugia malayi* reveals sex-specific differences in cargo and a sensitivity to  
787 ivermectin. *PLOS Neglected Tropical Diseases*. 2018 Apr 16;12(4):e0006438.
- 788 24. Loghry HJ, Yuan W, Zamanian M, Wheeler NJ, Day TA, Kimber MJ. Ivermectin inhibits extracellular  
789 vesicle secretion from parasitic nematodes. *Journal of Extracellular Vesicles*. 2020;10(2):e12036.
- 790 25. Ricciardi A, Bennuru S, Tariq S, Kaur S, Wu W, Elkahloun AG, et al. Extracellular vesicles released  
791 from the filarial parasite *Brugia malayi* downregulate the host mTOR pathway. *PLOS Neglected*  
792 *Tropical Diseases*. 2021 Jan 7;15(1):e0008884.
- 793 26. Eichenberger RM, Ryan S, Jones L, Buitrago G, Polster R, Montes de Oca M, et al. Hookworm  
794 Secreted Extracellular Vesicles Interact With Host Cells and Prevent Inducible Colitis in Mice. *Front*  
795 *Immunol* [Internet]. 2018 [cited 2020 Jun 3];9. Available from:  
796 <https://www.frontiersin.org/articles/10.3389/fimmu.2018.00850/full>
- 797 27. Eichenberger RM, Talukder MH, Field MA, Wangchuk P, Giacomini P, Loukas A, et al.  
798 Characterization of *Trichuris muris* secreted proteins and extracellular vesicles provides new  
799 insights into host–parasite communication. *Journal of Extracellular Vesicles*. 2018 Dec  
800 1;7(1):1428004.
- 801 28. Shears RK, Bancroft AJ, Hughes GW, Grecis RK, Thornton DJ. Extracellular vesicles induce  
802 protective immunity against *Trichuris muris*. *Parasite Immunology*. 2018;40(7):e12536.
- 803 29. Coakley G, McCaskill JL, Borger JG, Simbari F, Robertson E, Millar M, et al. Extracellular Vesicles  
804 from a Helminth Parasite Suppress Macrophage Activation and Constitute an Effective Vaccine for  
805 Protective Immunity. *Cell Reports*. 2017 May 23;19(8):1545–57.
- 806 30. Kosanović M, Cvetković J, Gruden-Movsesijan A, Vasilev S, Svetlana M, Ilić N, et al. *Trichinella*  
807 *spiralis* muscle larvae release extracellular vesicles with immunomodulatory properties. *Parasite*  
808 *Immunology*. 2019;41(10):e12665.
- 809 31. Yang Y, Liu L, Liu X, Zhang Y, Shi H, Jia W, et al. Extracellular Vesicles Derived From *Trichinella*  
810 *spiralis* Muscle Larvae Ameliorate TNBS-Induced Colitis in Mice. *Frontiers in Immunology*  
811 [Internet]. 2020 [cited 2022 Jan 24];11. Available from:  
812 <https://www.frontiersin.org/article/10.3389/fimmu.2020.01174>
- 813 32. Duque-Correa MA, Schreiber F, Rodgers FH, Goulding D, Forrest S, White R, et al. Development of  
814 caecaloids to study host–pathogen interactions: new insights into immunoregulatory functions of  
815 *Trichuris muris* extracellular vesicles in the caecum. *International Journal for Parasitology*. 2020  
816 Aug 1;50(9):707–18.
- 817 33. Barondes SH, Cooper DN, Gitt MA, Leffler H. Galectins. Structure and function of a large family of  
818 animal lectins. *Journal of Biological Chemistry*. 1994 Aug 19;269(33):20807–10.

- 819 34. Houzelstein D, Gonçalves IR, Fadden AJ, Sidhu SS, Cooper DNW, Drickamer K, et al. Phylogenetic  
820 Analysis of the Vertebrate Galectin Family. *Molecular Biology and Evolution*. 2004 Jul  
821 1;21(7):1177–87.
- 822 35. Bänfer S, Jacob R. Galectins in Intra- and Extracellular Vesicles. *Biomolecules*. 2020 Aug  
823 24;10(9):1232.
- 824 36. Brewer CF, Miceli MC, Baum LG. Clusters, bundles, arrays and lattices: novel mechanisms for  
825 lectin–saccharide-mediated cellular interactions. *Current Opinion in Structural Biology*. 2002 Oct  
826 1;12(5):616–23.
- 827 37. Earl LA, Bi S, Baum LG. Galectin multimerization and lattice formation are regulated by linker  
828 region structure. *Glycobiology*. 2011 Jan 1;21(1):6–12.
- 829 38. Garner OB, Baum LG. Galectin–glycan lattices regulate cell-surface glycoprotein organization and  
830 signalling. *Biochemical Society Transactions*. 2008 Nov 19;36(6):1472–7.
- 831 39. Lajoie P, Goetz JG, Dennis JW, Nabi IR. Lattices, rafts, and scaffolds: domain regulation of receptor  
832 signaling at the plasma membrane. *Journal of Cell Biology*. 2009 Apr 27;185(3):381–5.
- 833 40. Demotte N, Stroobant V, Courtoy PJ, Van Der Smissen P, Colau D, Luescher IF, et al. Restoring the  
834 Association of the T Cell Receptor with CD8 Reverses Anergy in Human Tumor-Infiltrating  
835 Lymphocytes. *Immunity*. 2008 Mar 14;28(3):414–24.
- 836 41. Johannes L, Jacob R, Leffler H. Galectins at a glance. *Journal of Cell Science*. 2018 May  
837 1;131(9):jcs208884.
- 838 42. Li S, Wandel MP, Li F, Liu Z, He C, Wu J, et al. Sterical hindrance promotes selectivity of the  
839 autophagy cargo receptor NDP52 for the danger receptor galectin-8 in anti-bacterial autophagy.  
840 *Sci Signal*. 2013 Feb 5;6(261):ra9.
- 841 43. Kim BW, Beom Hong S, Hoe Kim J, Hoon Kwon D, Kyu Song H. Structural basis for recognition of  
842 autophagic receptor NDP52 by the sugar receptor galectin-8. *Nat Commun*. 2013 Mar  
843 19;4(1):1613.
- 844 44. Thiemann S, Baum LG. Galectins and Immune Responses—Just How Do They Do Those Things They  
845 Do? *Annual Review of Immunology*. 2016;34(1):243–64.
- 846 45. Schnaar RL. Glycans and glycan-binding proteins in immune regulation: A concise introduction to  
847 glycobiology for the allergist. *Journal of Allergy and Clinical Immunology*. 2015 Mar 1;135(3):609–  
848 15.
- 849 46. Howe KL, Bolt BJ, Cain S, Chan J, Chen WJ, Davis P, et al. WormBase 2016: expanding to enable  
850 helminth genomic research. *Nucleic Acids Research*. 2016 Jan 4;44(D1):D774–80.
- 851 47. Howe KL, Bolt BJ, Shafie M, Kersey P, Berriman M. WormBase ParaSite – a comprehensive resource  
852 for helminth genomics. *Molecular and Biochemical Parasitology*. 2017 Jul 1;215:2–10.

- 853 48. Sano K, Ogawa H. Hemagglutination (Inhibition) Assay. In: Hirabayashi J, editor. Lectins: Methods  
854 and Protocols [Internet]. New York, NY: Springer; 2014 [cited 2021 May 28]. p. 47–52. (Methods in  
855 Molecular Biology). Available from: [https://doi.org/10.1007/978-1-4939-1292-6\\_4](https://doi.org/10.1007/978-1-4939-1292-6_4)
- 856 49. Blixt O, Head S, Mondala T, Scanlan C, Huflejt ME, Alvarez R, et al. Printed covalent glycan array for  
857 ligand profiling of diverse glycan binding proteins. PNAS. 2004 Dec 7;101(49):17033–8.
- 858 50. Mehta AY, Cummings RD. GLAD: GLycan Array Dashboard, a visual analytics tool for glycan  
859 microarrays. Bioinformatics. 2019 Sep 15;35(18):3536–7.
- 860 51. Mehta AY, Cummings RD. GlycoGlyph: a glycan visualizing, drawing and naming application.  
861 Bioinformatics. 2020 Jun 1;36(11):3613–4.
- 862 52. Hertz MI, Glaessner PM, Rush A, Budge PJ. *Brugia malayi* galectin 2 is a tandem-repeat type  
863 galectin capable of binding mammalian polysaccharides. Molecular and Biochemical Parasitology.  
864 2020 Jan 1;235:111233.
- 865 53. F M, Ym P, J L, N B, T G, N M, et al. The EMBL-EBI search and sequence analysis tools APIs in 2019.  
866 Nucleic Acids Res. 2019 Jul 1;47(W1):W636–41.
- 867 54. Ueno M, Ogawa H, Matsumoto I, Seno N. A novel mannose-specific and sugar specifically  
868 aggregatable lectin from the bark of the Japanese pagoda tree (*Sophora japonica*). Journal of  
869 Biological Chemistry. 1991 Feb;266(5):3146–53.
- 870 55. Miyanishi N, Nishi N, Abe H, Kashio Y, Shinonaga R, Nakakita S ichi, et al. Carbohydrate-recognition  
871 domains of galectin-9 are involved in intermolecular interaction with galectin-9 itself and other  
872 members of the galectin family. Glycobiology. 2007 Apr 1;17(4):423–32.
- 873 56. Zhu C, Anderson AC, Schubart A, Xiong H, Imitola J, Khoury SJ, et al. The Tim-3 ligand galectin-9  
874 negatively regulates T helper type 1 immunity. Nat Immunol. 2005 Dec;6(12):1245–52.
- 875 57. Nagahara K, Arikawa T, Oomizu S, Kontani K, Nobumoto A, Tateno H, et al. Galectin-9 Increases  
876 Tim-3+ Dendritic Cells and CD8+ T Cells and Enhances Antitumor Immunity via Galectin-9-Tim-3  
877 Interactions. The Journal of Immunology. 2008 Dec 1;181(11):7660–9.
- 878 58. Seki M, Oomizu S, Sakata KM, Sakata A, Arikawa T, Watanabe K, et al. Galectin-9 suppresses the  
879 generation of Th17, promotes the induction of regulatory T cells, and regulates experimental  
880 autoimmune arthritis. Clin Immunol. 2008 Apr 1;127(1):78–88.
- 881 59. Enninga EAL, Nevala WK, Holtan SG, Leontovich AA, Markovic SN. Galectin-9 modulates immunity  
882 by promoting Th2/M2 differentiation and impacts survival in patients with metastatic melanoma.  
883 Melanoma Res. 2016 Oct;26(5):429–41.
- 884 60. Arikawa T, Watanabe K, Seki M, Matsukawa A, Oomizu S, Sakata K mei, et al. Galectin-9  
885 ameliorates immune complex-induced arthritis by regulating FcγR expression on macrophages.  
886 Clinical Immunology. 2009 Dec 1;133(3):382–92.

- 887 61. Jung SH, Hwang JH, Kim SE, Kim YK, Park HC, Lee HT. Human galectin-9 on the porcine cells affects  
888 the cytotoxic activity of M1-differentiated THP-1 cells through inducing a shift in M2-differentiated  
889 THP-1 cells. *Xenotransplantation*. 2017;24(4):e12305.
- 890 62. Lv R, Bao Q, Li Y. Regulation of M1-type and M2-type macrophage polarization in RAW264.7 cells  
891 by Galectin-9. *Molecular Medicine Reports*. 2017 Dec 1;16(6):9111–9.
- 892 63. Zhang Y, Ma CJ, Wang JM, Ji XJ, Wu XY, Moorman JP, et al. Tim-3 regulates pro- and anti-  
893 inflammatory cytokine expression in human CD14+ monocytes. *J Leukoc Biol*. 2012 Feb;91(2):189–  
894 96.
- 895 64. Zhang Y, Ma CJ, Wang JM, Ji XJ, Wu XY, Jia ZS, et al. Tim-3 Negatively Regulates IL-12 Expression by  
896 Monocytes in HCV Infection. *PLoS One*. 2011 May 26;6(5):e19664.
- 897 65. Monney L, Sabatos CA, Gaglia JL, Ryu A, Waldner H, Chernova T, et al. Th1-specific cell surface  
898 protein Tim-3 regulates macrophage activation and severity of an autoimmune disease. *Nature*.  
899 2002 Jan;415(6871):536–41.
- 900 66. Gao X, Zhu Y, Li G, Huang H, Zhang G, Wang F, et al. TIM-3 Expression Characterizes Regulatory T  
901 Cells in Tumor Tissues and Is Associated with Lung Cancer Progression. *PLOS ONE*. 2012 Feb  
902 17;7(2):e30676.
- 903 67. Anderson AC, Anderson DE, Bregoli L, Hastings WD, Kassam N, Lei C, et al. Promotion of Tissue  
904 Inflammation by the Immune Receptor Tim-3 Expressed on Innate Immune Cells. *Science*. 2007  
905 Nov 16;318(5853):1141–3.
- 906 68. Ndhlovu LC, Lopez-Vergès S, Barbour JD, Jones RB, Jha AR, Long BR, et al. Tim-3 marks human  
907 natural killer cell maturation and suppresses cell-mediated cytotoxicity. *Blood*. 2012 Apr  
908 19;119(16):3734–43.
- 909 69. Wolf Y, Anderson AC, Kuchroo VK. TIM3 comes of age as an inhibitory receptor. *Nat Rev Immunol*.  
910 2020 Mar;20(3):173–85.
- 911 70. Zang X, Taylor P, Wang JM, Meyer DJ, Scott AL, Walkinshaw MD, et al. Homologues of Human  
912 Macrophage Migration Inhibitory Factor from a Parasitic Nematode: GENE CLONING, PROTEIN  
913 ACTIVITY, AND CRYSTAL STRUCTURE\*. *Journal of Biological Chemistry*. 2002 Nov  
914 15;277(46):44261–7.
- 915 71. Pastrana DV, Raghavan N, FitzGerald P, Eisinger SW, Metz C, Bucala R, et al. Filarial Nematode  
916 Parasites Secrete a Homologue of the Human Cytokine Macrophage Migration Inhibitory Factor.  
917 *Infection and Immunity*. 1998 Dec 1;66(12):5955–63.
- 918 72. Schönemeyer A, Lucius R, Sonnenburg B, Brattig N, Sabat R, Schilling K, et al. Modulation of Human  
919 T Cell Responses and Macrophage Functions by Onchocystatin, a Secreted Protein of the Filarial  
920 Nematode *Onchocerca volvulus*. *The Journal of Immunology*. 2001 Sep 15;167(6):3207–15.
- 921 73. Manoury B, Gregory WF, Maizels RM, Watts C. Bm-CPI-2, a cystatin homolog secreted by the  
922 filarial parasite *Brugia malayi*, inhibits class II MHC-restricted antigen processing. *Current Biology*.  
923 2001 Mar 20;11(6):447–51.

- 924 74. Kron MA, Metwali A, Vodanovic-Jankovic S, Elliott D. Nematode Asparaginyl-tRNA Synthetase  
925 Resolves Intestinal Inflammation in Mice with T-Cell Transfer Colitis. *Clinical and Vaccine*  
926 *Immunology*. 2013 Feb;20(2):276–81.
- 927 75. Gomez-Escobar N, Gregory WF, Maizels RM. Identification of tgh-2, a Filarial Nematode Homolog  
928 of *Caenorhabditis elegans* daf-7 and Human Transforming Growth Factor  $\beta$ , Expressed in  
929 Microfilarial and Adult Stages of *Brugia malayi*. *Infection and Immunity*. 2000 Nov;68(11):6402–10.
- 930 76. González-Miguel J, Morchón R, Siles-Lucas M, Oleaga A, Simón F. Surface-displayed glyceraldehyde  
931 3-phosphate dehydrogenase and galectin from *Dirofilaria immitis* enhance the activation of the  
932 fibrinolytic system of the host. *Acta Tropica*. 2015 May 1;145:8–16.
- 933 77. González-Miguel J, Larrazabal C, Loa-Mesón D, Siles-Lucas M, Simón F, Morchón R. Glyceraldehyde  
934 3-phosphate dehydrogenase and galectin from *Dirofilaria immitis* participate in heartworm disease  
935 endarteritis via plasminogen/plasmin system. *Veterinary Parasitology*. 2016 Jun 15;223:96–101.
- 936 78. Turner DG, Wildblood LA, Inglis NF, Jones DG. Characterization of a galectin-like activity from the  
937 parasitic nematode, *Haemonchus contortus*, which modulates ovine eosinophil migration in vitro.  
938 *Veterinary Immunology and Immunopathology*. 2008 Mar 15;122(1):138–45.
- 939 79. Wang W, Wang S, Zhang H, Yuan C, Yan R, Song X, et al. Galectin Hco-gal-m from *Haemonchus*  
940 *contortus* modulates goat monocytes and T cell function in different patterns. *Parasites & Vectors*.  
941 2014 Jul 23;7(1):342.
- 942 80. Jeong MS, Hwang HG, Yu HS, Jang SB. Structure of full-length *Toxascaris leonina* galectin with two  
943 carbohydrate-recognition domains. *Acta Cryst D*. 2013 Feb 1;69(2):168–75.
- 944 81. Kim JY, Cho MK, Choi SH, Lee KH, Ahn SC, Kim DH, et al. Inhibition of dextran sulfate sodium (DSS)-  
945 induced intestinal inflammation via enhanced IL-10 and TGF- $\beta$  production by galectin-9  
946 homologues isolated from intestinal parasites. *Molecular and Biochemical Parasitology*. 2010 Nov  
947 1;174(1):53–61.
- 948 82. Mengshol JA, Golden-Mason L, Arikawa T, Smith M, Niki T, McWilliams R, et al. A Crucial Role for  
949 Kupffer Cell-Derived Galectin-9 in Regulation of T Cell Immunity in Hepatitis C Infection. *PLOS ONE*.  
950 2010 Mar 4;5(3):e9504.
- 951 83. Kared H, Fabre T, Bédard N, Bruneau J, Shoukry NH. Galectin-9 and IL-21 Mediate Cross-regulation  
952 between Th17 and Treg Cells during Acute Hepatitis C. *PLOS Pathogens*. 2013 Jun  
953 20;9(6):e1003422.
- 954 84. Ji XJ, Ma CJ, Wang JM, Wu XY, Niki T, Hirashima M, et al. HCV-infected hepatocytes drive  
955 CD4+CD25+Foxp3+ regulatory T-cell development through the Tim-3/Gal-9 pathway. *European*  
956 *Journal of Immunology*. 2013;43(2):458–67.
- 957 85. Hsu YL, Wang MY, Ho LJ, Huang CY, Lai JH. Up-regulation of galectin-9 induces cell migration in  
958 human dendritic cells infected with dengue virus. *Journal of Cellular and Molecular Medicine*.  
959 2015;19(5):1065–76.

- 960 86. Katoh S, Ishii N, Nobumoto A, Takeshita K, Dai SY, Shinonaga R, et al. Galectin-9 Inhibits CD44–  
961 Hyaluronan Interaction and Suppresses a Murine Model of Allergic Asthma. *Am J Respir Crit Care*  
962 *Med.* 2007 Jul;176(1):27–35.
- 963 87. Nobumoto A, Nagahara K, Oomizu S, Katoh S, Nishi N, Takeshita K, et al. Galectin-9 suppresses  
964 tumor metastasis by blocking adhesion to endothelium and extracellular matrices. *Glycobiology.*  
965 2008 Sep 1;18(9):735–44.
- 966 88. Pioche-Durieu C, Keryer C, Souquère S, Bosq J, Faigle W, Loew D, et al. In Nasopharyngeal  
967 Carcinoma Cells, Epstein-Barr Virus LMP1 Interacts with Galectin 9 in Membrane Raft Elements  
968 Resistant to Simvastatin. *J Virol.* 2005 Nov;79(21):13326–37.
- 969
- 970



Figure 1

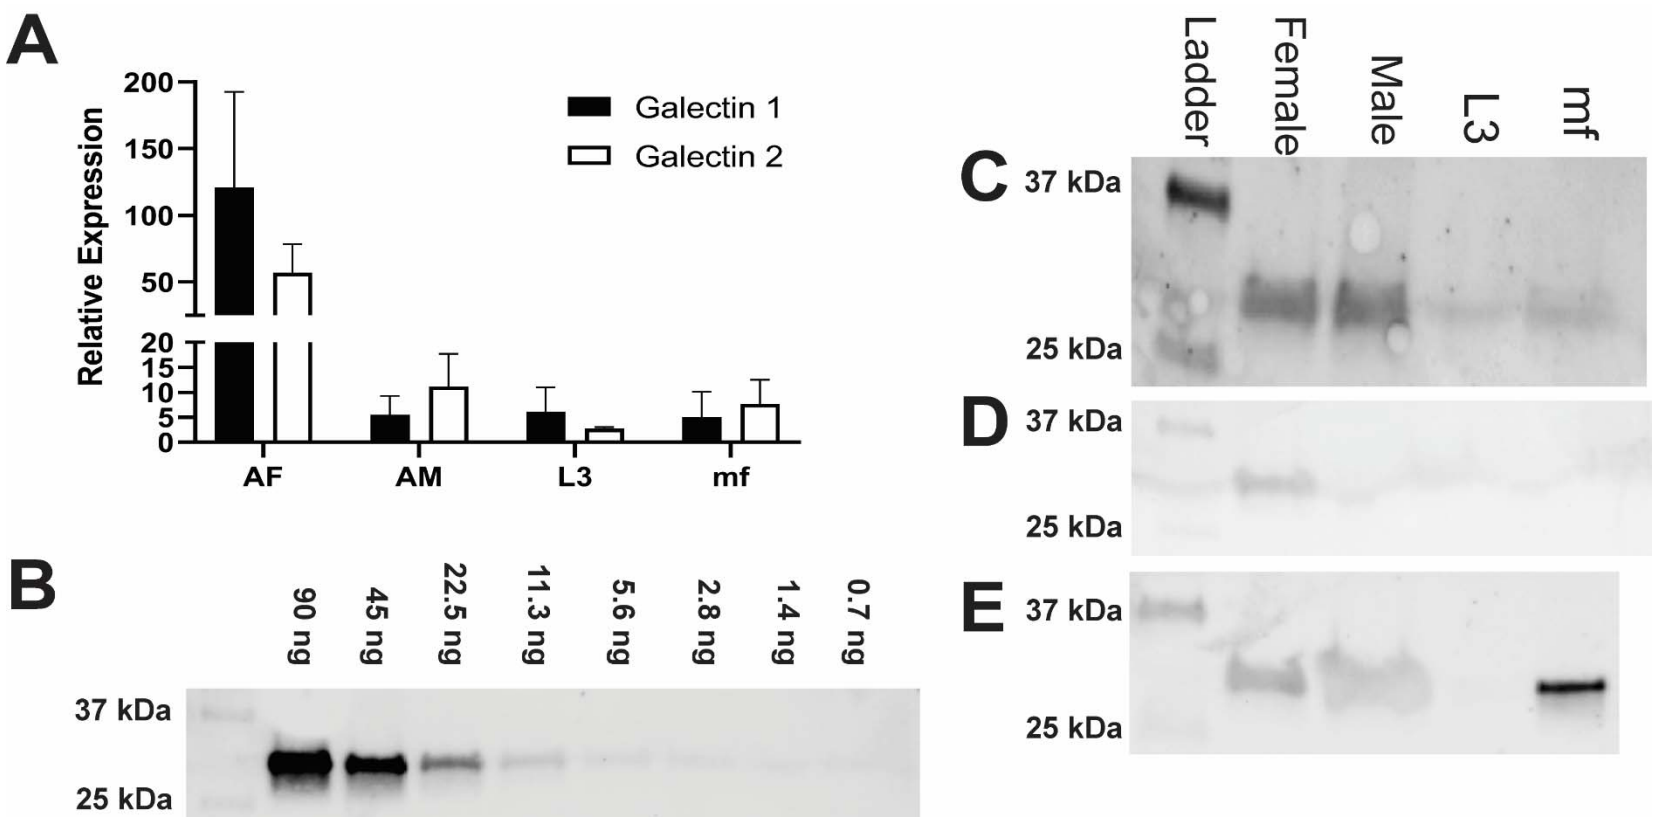

Figure 2

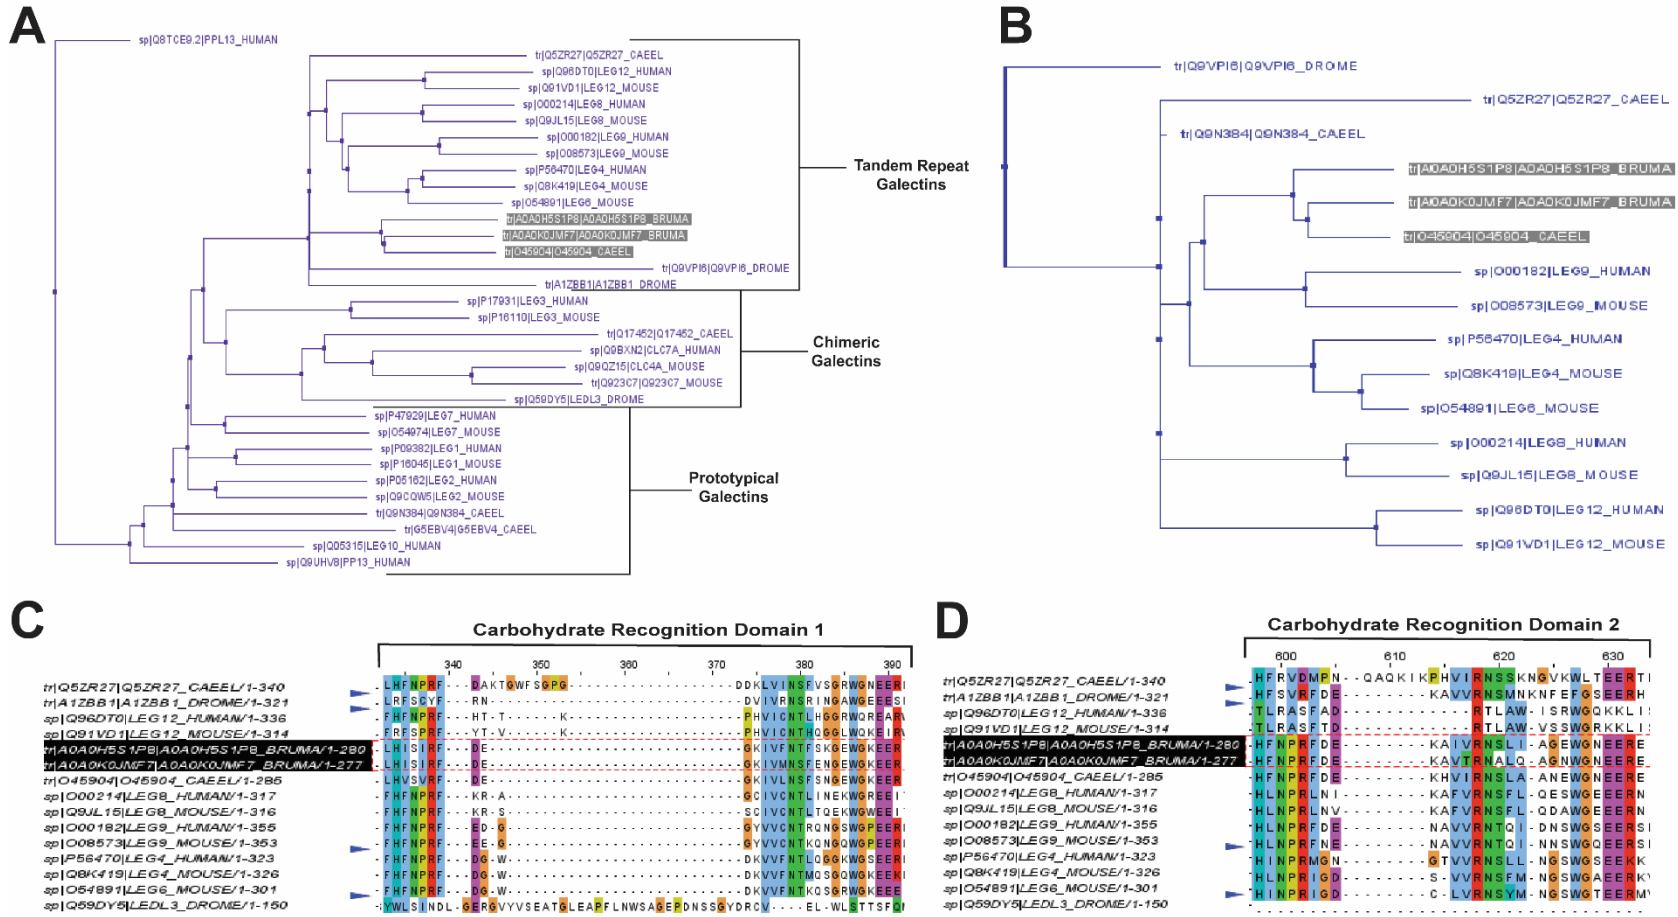

Figure 3

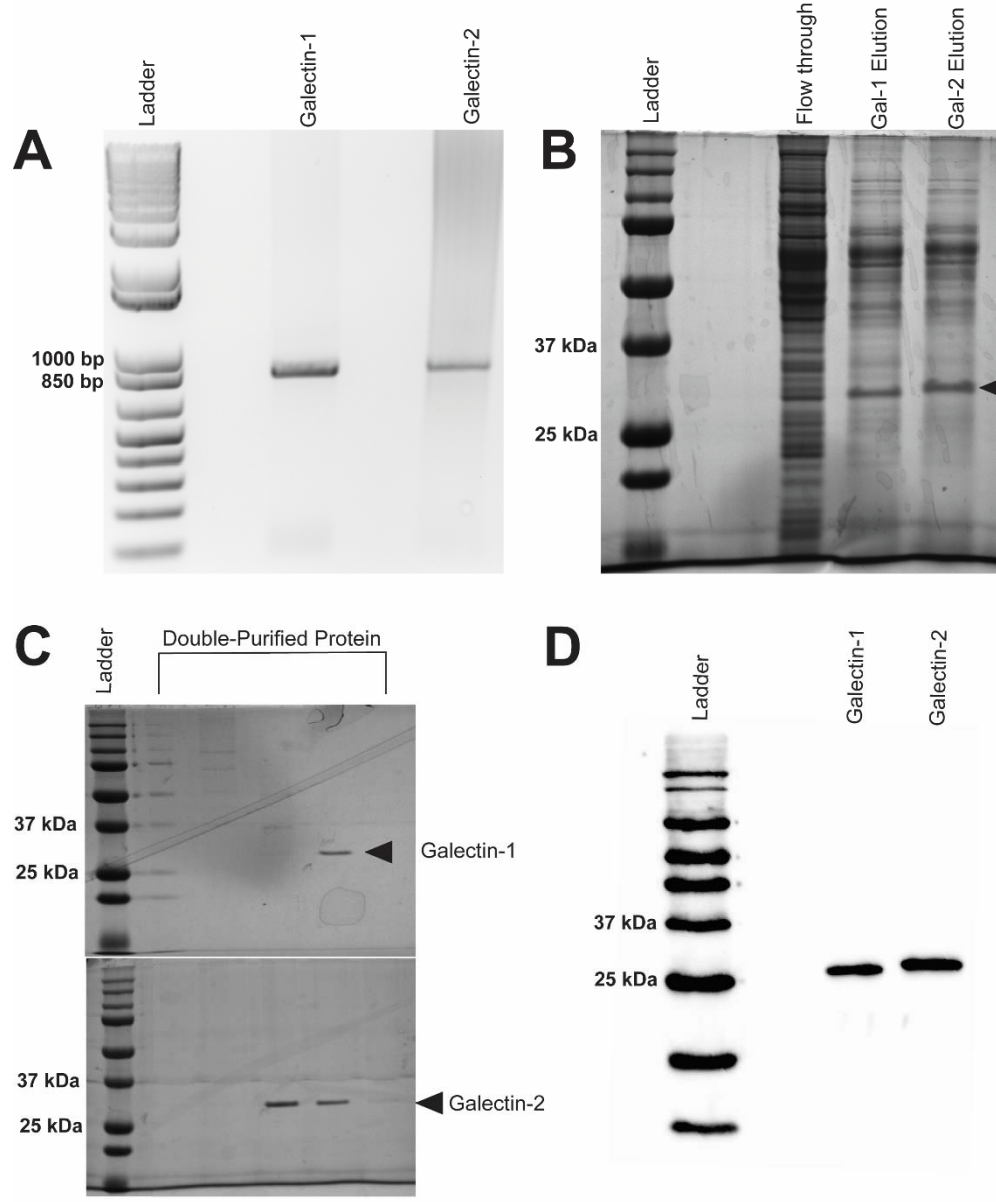

Figure 4

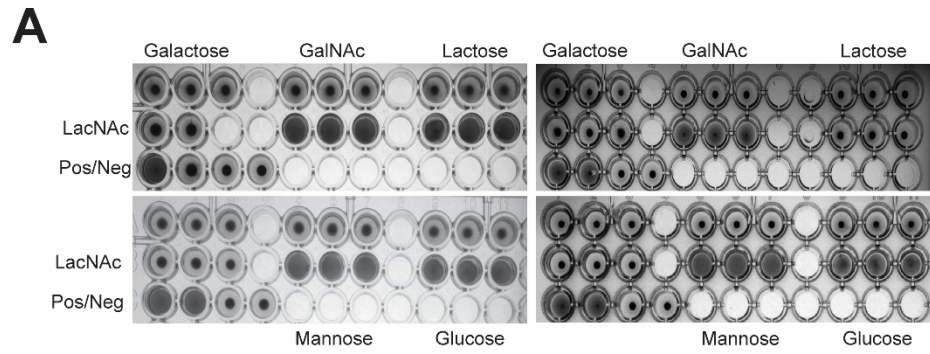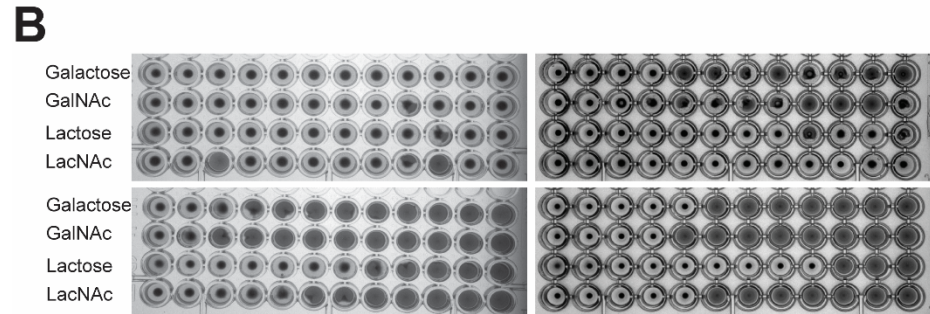

**C**

|                       | rBma-LEC-1   | rBma-LEC-2 | Human Galectin-9 | Mouse Galectin-9 |
|-----------------------|--------------|------------|------------------|------------------|
| Galactose             | <488 $\mu$ M | 125 mM     | 125 mM           | 62.5 mM          |
| N-acetylgalactosamine | <440 $\mu$ M | 450 mM     | 112.5 mM         | 112.5 mM         |
| Lactose               | <488 $\mu$ M | 15.6 mM    | <488 $\mu$ M     | 4 mM             |
| N-acetyllactosamine   | <255 $\mu$ M | 2 mM       | <255 $\mu$ M     | 2 mM             |

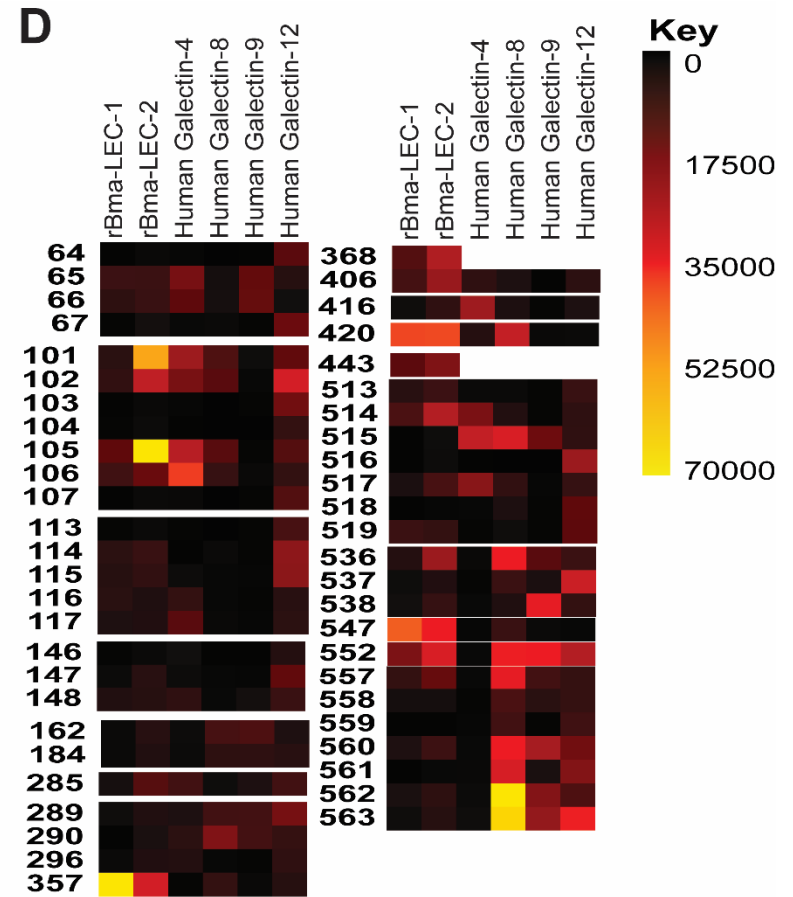

Figure 5

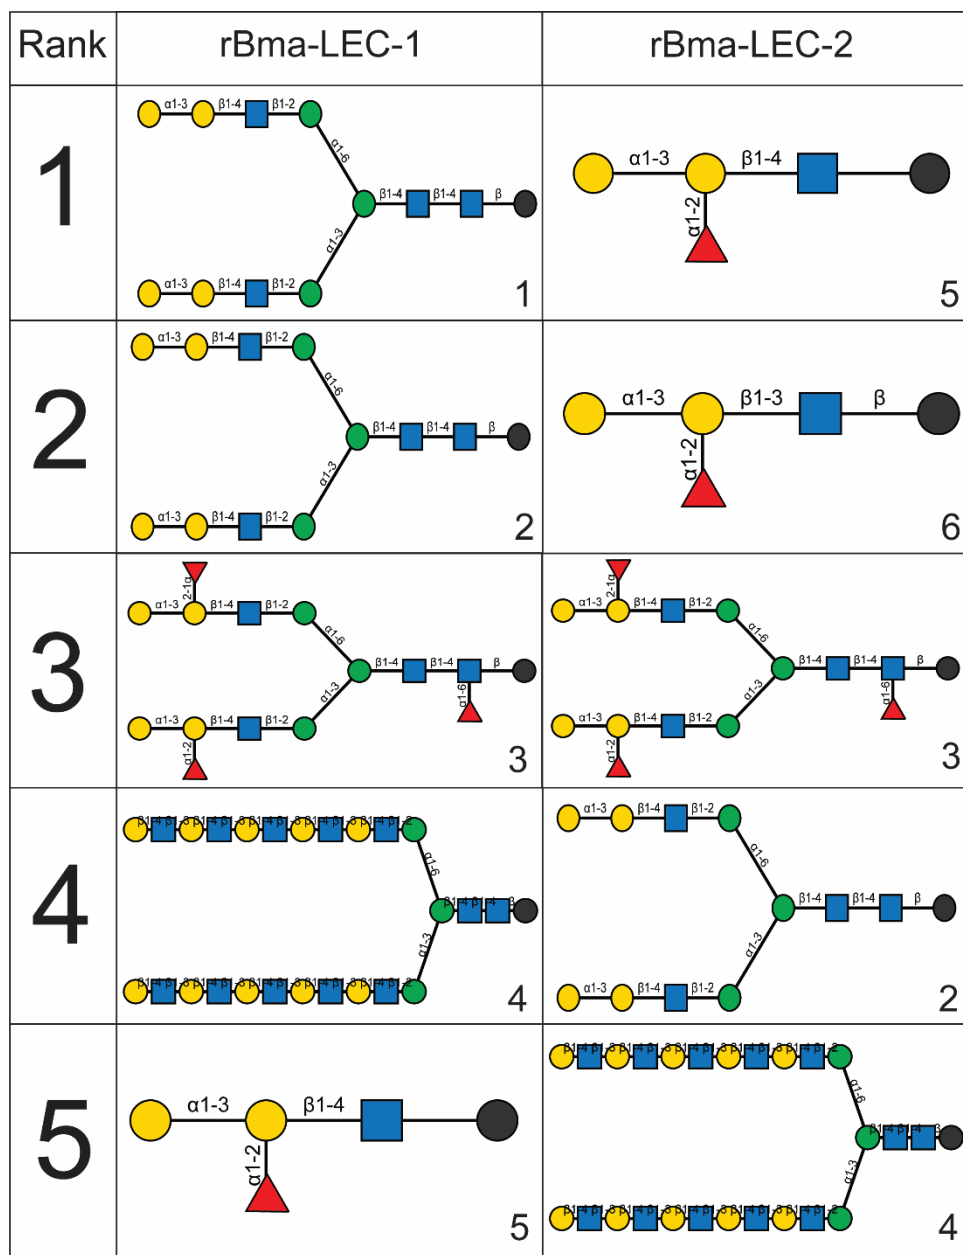

Figure 6

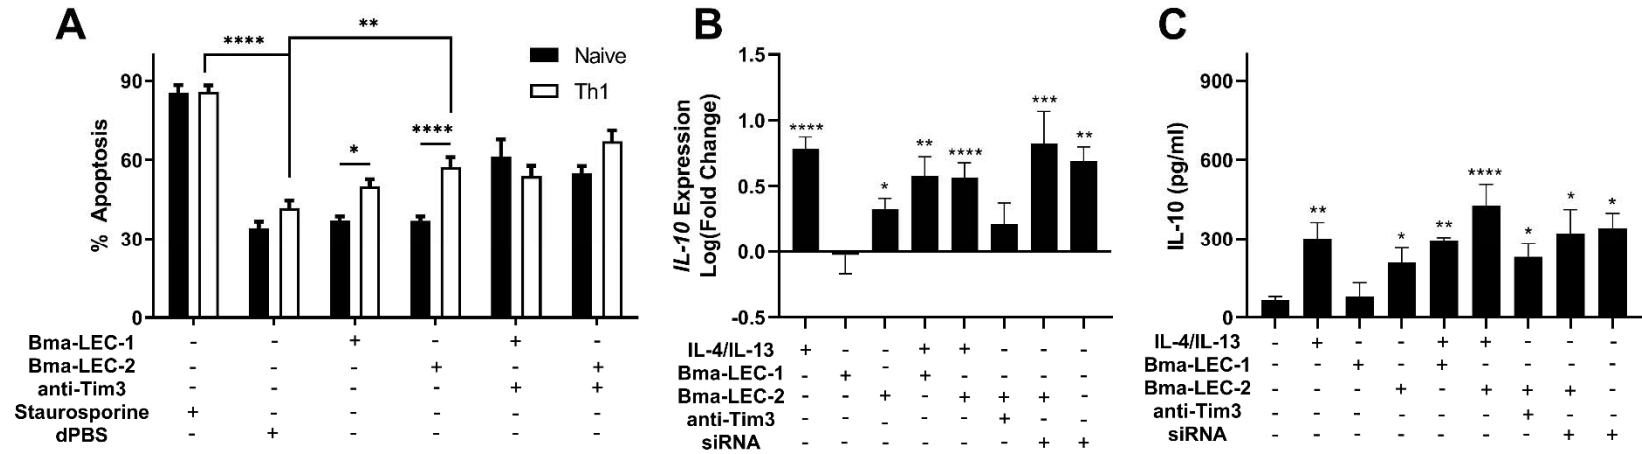

Source: https://www.biorxiv.org/content/10.1101/2022.05.23.493127v1.full.pdf
